# Supplementary material for: Phenotypic variation of Chitala chitala (Hamilton, 1822) from Indian rivers using truss network and geometric morphometrics
Source: PeerJ. 2022 Apr 18;10:e13290. doi: 10.7717/peerj.13290 (PMC9022642; doi:10.7717/peerj.13290)
Supplement: Supplemental Information 18 [file peerj-10-13290-s018.xlsx]

## Sheet: Landmark_coord_data
			Landmark_coordinates
LOCATION	Fish code	Location	X1	Y1	X2	Y2	X3	Y3	X4	Y4	X5	Y5	X6	Y6	X7	Y7	X8	Y8	X9	Y9
Son River	NC 1100	1	0.633346	15.8503	6.55013	18.8837	17.7337	19.9837	32.9673	17.3003	17.767	13.0836	10.3169	11.5169	6.5668	13.6503	2.66672	14.2836	2.68339	16.467
Son River	NC 1101	1	0.413796	5.17245	4.06899	7.48281	11.3449	8.17247	20.0001	7.75868	11.3794	3.72416	6.00004	3.31037	4.10348	4.62072	1.55174	4.51727	1.58622	5.72418
Son River	NC 1001	1	0.893634	9.25549	7.53206	14.3833	19.7025	16.3195	37.7241	14.2343	19.7238	7.08524	11.7662	6.17033	7.55333	8.65974	3.2341	8.2342	3.27666	10.6172
Son River	NC1105	1	0.68924	37.4947	12.8543	43.3532	34.2208	45.3175	60.3085	37.9771	34.2552	30.5333	18.6095	30.1543	12.6131	34.1518	4.51452	35.0479	4.54898	38.7353
Son River	NC1106	1	0.133332	34.0663	11.3666	40.2663	33.5663	41.9996	60.3661	35.0996	33.5663	27.7664	17.8332	27.4331	11.4999	31.333	3.79996	31.5664	3.89996	35.3663
Son River	NC1107	1	0.68924	28.5001	13.5091	37.9082	36.8743	40.0793	66.615	33.9795	36.9433	24.1923	20.6083	23.4686	13.4746	27.0527	5.37607	26.1911	5.41053	30.7401
Son River	NC1108	1	1.77419	27.8387	12.5161	34.5161	35.6451	35.8386	63.8708	31.258	35.6451	20.258	19.0322	20.1612	12.4193	25.0645	5.80644	24.9677	5.87096	29.1612
Son River	NC1109	1	1.18366	19.0611	8.55095	22.6937	21.7753	23.3876	39.367	20.7958	21.8366	14.8978	12.3264	14.4489	8.48973	16.5305	3.75507	17.3264	3.73466	19.8162
Son River	NC1110	1	1.20453	24.7042	9.11353	28.9769	23.0679	28.9087	39.4995	25.0224	23.0906	20.3634	12.6135	20.2043	9.15898	22.6361	3.93177	23.0452	3.93177	25.727
Son River	NC1111	1	1.49998	25.7724	8.7499	28.6815	21.8179	29.386	37.7041	26.1361	21.8406	21.3179	12.9544	20.4316	8.70444	23.0452	3.93177	23.977	3.9545	26.4997
Son River	NC1112	1	2.8811	27.8997	12.5534	32.6623	32.3683	34.1322	55.3877	30.1928	32.4271	21.5201	17.4336	21.5789	12.5534	24.8128	6.29139	25.5477	6.35018	29.0462
Son River	NC1113	1	0.779654	15.9151	6.49147	21.4066	15.6778	21.593	28.0845	22.7456	15.6439	15.3219	8.93212	15.0507	6.50842	16.3388	3.06777	15.3049	3.05082	17.9998
BANSAGAR_MAIHAR_M.P.	NC 1166	1	0.39024	24.7315	8.46333	29.5851	24.4388	30.3412	42.9752	26.0485	24.5119	19.8535	13.4633	19.2437	8.41455	21.9754	3.46338	22.512	3.53655	25.7802
BANSAGAR_MAIHAR_M.P.	NC 1167	1	2.99998	38.1783	14.7856	45.2139	36.964	47.4282	63.3924	42.9639	37.0354	32.214	21.107	31.8926	14.6785	35.4997	7.32137	35.464	7.46423	39.6783
BANSAGAR_MAIHAR_M.P.	NC 1168	1	4.31654	41.207	17.5859	49.3205	43.3253	50.4796	70.7833	44.6842	43.4852	34.8921	25.4196	34.0128	17.506	38.729	8.8729	38.8489	8.91286	43.2853
BANSAGAR_MAIHAR_M.P.	NC 1169	1	0.428568	37.8926	11.5356	45.6068	37.1426	47.3925	63.4995	42.9639	37.1783	32.1069	19.3213	31.7855	11.607	35.9997	4.60711	35.9997	4.67853	39.964
BANSAGAR_MAIHAR_M.P.	NC 1170	1	1.99904	24.457	14.8054	32.9217	37.2946	35.4205	63.4695	33.4839	37.3571	20.3652	22.1144	18.6473	14.8991	22.4892	5.74724	21.8645	5.74724	26.0812
BANSAGAR_MAIHAR_M.P.	NC 1171	1	0.948421	24.1207	10.6377	28.8115	30.0162	28.8884	50.5483	26.0688	30.0419	17.4304	15.5849	17.0459	10.7402	20.6858	3.58862	21.1729	3.69115	24.7358
BANSAGAR_MAIHAR_M.P.	NC 1172	1	1.13635	20.3634	9.95443	26.1133	25.7042	26.886	44.0222	25.477	25.6361	16.7953	13.7498	16.1362	9.88625	18.6361	4.18177	18.4543	4.22722	21.5679
BANSAGAR_MAIHAR_M.P.	NC 1173	1	1.58064	19.7096	14.6451	31.8064	40.1612	33.9999	70.0966	25.5483	40.258	17.0322	22.1612	15.8064	14.7742	20.3871	6.29031	18.6451	6.29031	22.8387
BANSAGAR_MAIHAR_M.P.	NC 1174	1	0.270829	19.6039	7.66654	24.5829	21.8122	25.8121	38.2077	20.1038	21.7913	16.9581	12.0206	16.1664	7.66654	18.583	2.97912	18.2705	3.02079	20.6872
BANSAGAR_MAIHAR_M.P.	NC 1175	1	1.36584	26.0241	9.48771	32.2436	24.4388	33.4631	42.024	27.1217	24.4632	23.951	12.9267	23.5851	9.53649	25.3412	4.92678	24.8534	4.92678	27.8046
BANSAGAR_MAIHAR_M.P.	NC 1176	1	0.871537	21.6821	8.33274	27.8892	21.7672	28.5694	36.1582	20.0241	21.7884	20.3642	12.6054	19.9391	8.33274	21.6184	4.12386	20.8744	4.1026	23.6803
BANSAGAR_MAIHAR_M.P.	NC 1177	1	0.52	20.06	8.72	23.08	23.08	22.92	39.74	18.94	23.1	14.1	12.22	14.5	8.72	17.06	3.8	17.94	3.84	20.7
BANSAGAR_MAIHAR_M.P.	NC 1178	1	0.499882	24.7333	7.56343	30.4493	21.0168	31.297	35.8611	24.9506	21.0602	22.6468	11.1713	22.2773	7.56343	24.3855	2.95582	23.8205	2.99929	26.1243
BANSAGAR_MAIHAR_M.P.	NC 1179	1	1.34693	24.4692	7.51014	28.2243	19.6937	28.9181	32.8161	24.8978	19.7345	21.0406	10.5713	21.0406	7.46933	23.2651	3.46936	23.0406	3.46936	25.2651
BANSAGAR_MAIHAR_M.P.	NC 1180	1	1.11907	20.5718	9.97639	25.6196	27.9291	27.2625	47.739	22.6433	27.9767	16.0003	15.286	15.2146	10.0716	18.667	4.02389	19.048	4.07151	21.7147
BANSAGAR_MAIHAR_M.P.	NC 1181	1	0.632648	18.8978	8.61218	22.8978	23.5916	23.0814	39.9997	20.3672	23.6325	14.0203	12.5305	14.1223	8.61218	16.7142	3.3265	17.1631	3.34691	19.7754
BANSAGAR_MAIHAR_M.P.	NC 1182	1	1.76599	19.5748	9.44699	24.1281	24.2345	24.4473	41.5753	19.2344	24.2345	15.3407	13.5109	15.5322	9.48954	17.894	4.48945	18.1067	4.55328	20.5323
BANSAGAR_MAIHAR_M.P.	NC 1183	1	9.77961	33.3006	21.5223	40.903	44.3295	42.295	69.1354	34.8711	44.3652	27.9468	26.3764	28.3038	21.558	31.6945	14.027	31.2305	14.0983	35.2637
BANSAGAR_MAIHAR_M.P.	NC 1184	1	2.2857	30.2498	15.857	39.714	43.3925	40.4997	70.7494	27.0355	43.3568	23.9998	23.7498	23.9284	15.8927	27.7141	7.49994	27.6069	7.46423	32.3212
BANSAGAR_MAIHAR_M.P.	NC 1185	1	4.89576	21.1663	11.1665	25.2704	23.2913	25.9371	36.8327	21.0205	23.3121	18.1247	14.6456	17.8539	11.1873	20.2497	7.16655	19.8747	7.20822	22.0621
BANSAGAR_MAIHAR_M.P.	NC 1186	1	2.53125	21.7188	15.0625	29.3125	41.375	29.0938	70.625	19.7188	41.4062	12.5312	22.1875	12.875	15.5312	19.125	7.125	18.875	7.15625	23.4062
BANSAGAR_MAIHAR_M.P.	NC 1187	1	1.14582	16.9997	8.93736	21.0205	23.8746	22.0413	42.3118	18.6872	23.8746	12.7915	13.8539	12.229	9.04152	14.6039	3.9791	15.5206	3.99994	18.1039
BANSAGAR_MAIHAR_M.P.	NC 1188	1	4.61768	23.8237	15.9707	30.765	37.9415	31.9708	62.2358	26.059	38.0297	17.9707	22.6178	17.1178	16.0001	21.559	8.73536	21.5884	8.76478	25.4708
BANSAGAR_MAIHAR_M.P.	NC 1189	1	2.88465	40.2697	16.5002	46.4236	43.2698	47.0006	72.9624	38.962	43.2698	30.1542	22.6157	30.7311	16.4617	35.5004	7.34624	36.6543	7.3847	41.3851
BANSAGAR_MAIHAR_M.P.	NC 1190	1	1.09617	13.6348	9.01934	18.4233	24.0964	20.3079	41.1159	18.0194	24.1157	10.7501	15.5386	9.38473	9.03857	11.5001	4.07697	11.8271	4.0962	14.6925
BANSAGAR_MAIHAR_M.P.	NC 1191	1	1.21428	31.7497	15.0713	40.3568	40.7854	42.2854	68.7852	34.2497	40.8925	26.2141	22.607	24.9284	15.0356	28.8926	6.07138	28.7141	6.10709	33.5712
BANSAGAR_MAIHAR_M.P.	Nc 1230	1	1.41178	22.2355	11.5883	28.2061	35.2356	31.3238	64.4711	22.8825	35.2062	16.3531	18.1178	16.0001	11.7942	20.1472	4.88239	20.0884	4.9118	23.6472
BANSAGAR_MAIHAR_M.P.	Nc 1231	1	1.463	14.8893	8.74097	20.0746	22.1487	21.0005	37.7417	16.0745	22.1487	11.6855	12.167	11.3336	8.75949	13.7596	3.81491	13.4818	3.77788	15.9819
BANSAGAR_MAIHAR_M.P.	Nc 1232	1	2.11425	22.3711	12.7427	29.3996	33.4566	32.4281	59.7705	27.1425	33.5138	18.5997	19.1426	17.0855	12.9998	20.4568	5.65706	20.3711	5.65706	23.7139
BANSAGAR_MAIHAR_M.P.	Nc 1233	1	1.7027	20.6486	12.6216	27.6756	34.2973	29.1621	58.5945	24.5675	34.3513	15.8919	18.2162	15.7297	12.6216	18.7027	5.32432	18.6486	5.37837	22.3784
BANSAGAR_MAIHAR_M.P.	Nc 1234	1	0.96	14.56	8.6	20.58	23.78	22.2	40.86	16.96	23.8	12.12	13.52	11.48	8.7	13.84	4.18	12.98	4.18	16.16
Ban Sagar, Daoloand	NC 1500	2	1.23884	8.10678	8.25892	13.9532	20.8212	14.8878	36.6435	9.54123	20.8646	6.30286	11.6929	5.47697	8.25892	7.5417	3.67305	7.21569	3.65131	9.60643
Ban Sagar, Daoloand	NC 1501	2	1.80899	10.3549	8.29641	13.4531	19.7534	13.0996	33.0401	12.1015	19.8157	5.67649	11.1658	5.67649	8.27561	8.44196	3.76353	8.77465	3.84671	11.1243
Ban Sagar, Daoloand	NC 1502	2	1.17949	11.2564	7.92307	16.359	22.6154	16.641	40.4102	13.5897	22.6154	7.28204	11.7949	7.28204	7.89743	10.1026	3.71794	10.1795	3.6923	12.6923
Ban Sagar, Daoloand	NC 1503	2	1.77709	14.5221	9.07981	17.2988	26.0177	17.2711	45.8156	12.273	26.101	6.35864	12.8839	7.55262	9.07981	11.0513	3.91515	12.3563	3.99845	15.0775
Ban Sagar, Daoloand	NC 1504	2	1.14	5.46	8.3	12.58	20.08	14.18	35.98	7.26	20.02	5.76	11.82	4.3	8.38	5.78	4.04	4.98	4.04	7.94
Ban Sagar, Daoloand	NC 1505	2	0.499994	8.04536	8.54535	14.3635	23.4543	16.0225	42.045	12.2499	23.4088	5.59084	13.3635	4.09086	8.56808	7.18173	3.52269	6.63628	3.52269	9.86352
Ban Sagar, Daoloand	NC 1506	2	1.2	8.4	8.25	14.35	23.225	15.6	41.275	9.775	23.225	5.9	12.325	5.225	8.325	7.925	3.95	7.4	3.95	10.1
Ban Sagar, Daoloand	NC 1507	2	1.18606	7.04657	8.02332	13.0931	20.6746	12.9768	35.791	7.46518	20.6746	4.88376	11.1861	4.95353	8.02332	6.69773	3.76747	6.11633	3.79073	8.83728
Ban Sagar, Daoloand	NC 1508	2	1.48854	6.86505	8.1092	13.0192	21.3728	14.5966	38.0799	10.5753	21.2839	5.70977	11.8639	4.64335	8.1092	6.64288	4.26566	6.10968	4.28788	8.84237
Ban Sagar, Daoloand	NC 1509	2	0.711104	7.68881	7.24437	12.6443	21.9998	14.7999	39.1107	10.1332	22.0442	5.51106	11.6221	4.17774	7.31104	6.53327	3.19997	6.31105	3.22219	9.04435
Ban Sagar, Daoloand	NC 1510	2	1.7059	9.67655	9.26478	16.4119	21.559	18.2649	42.9121	12.9707	21.5884	7.353	12.9413	7.00006	9.35302	9.20596	4.76474	8.50007	4.73533	11.706
Ban Sagar, Daoloand	NC 1511	2	0.795445	6.84083	7.159	12.7726	19.1816	14.1362	35.6132	8.79535	19.1361	6.06811	10.5226	5.02267	7.11355	6.79537	3.34087	5.90902	3.3636	8.72717
Ban Sagar, Daoloand	NC 1512	2	0.25	11.25	8.85	16.7	26.4	17.9	44.9	14.6	26.45	6.725	12.675	6.425	8.875	9.675	3.15	9.45	3.15	12.65
Ban Sagar, Daoloand	NC 1513	2	1.06978	8.83728	9.48845	16.0932	24.6281	17.7443	44.512	13.7443	24.6514	6.79075	13.442	6.0233	9.48845	8.65123	4.46515	8.04658	4.46515	11.1164
Ban Sagar, Daoloand	NC 1514	2	1.19736	14.202	9.51236	17.8606	27.4728	18.0934	48.5929	12.8051	27.506	6.4857	13.9027	6.85156	9.61214	11.0091	3.89142	12.0734	3.92468	14.9337
Ban Sagar, Daoloand	NC 1515	2	2.32258	12.5484	13.258	18.6451	35.387	20.5483	59.7741	11.3871	35.4838	6.35483	19.4193	6.09676	13.3548	9.22579	6.03225	9.93546	6.09676	14.0322
Ranguba_Ken river	NC 1117	3	2.87096	15.4516	15.129	23.0967	36.8386	23.7741	61.3547	22.4193	36.9677	10.4193	21.6451	9.03224	15.2903	13.129	6.99999	13.0967	7.03224	17.1935
Ranguba_Ken river	NC 1118	3	1.32188	20.3441	12.9609	22.4397	37.2706	21.6015	61.9027	26.5666	37.3673	6.93182	18.6998	6.86733	12.6707	12.6707	3.86892	16.0238	3.86892	20.6342
Ranguba_Ken river	NC 1119	3	2.71426	16.5713	14.6785	19.607	40.7854	20.6427	68.4637	17.7856	40.8925	6.35709	22.607	5.32139	14.6785	9.67849	6.07138	12.6785	6.10709	17.107
Ranguba_Ken river	NC 1120	3	2.10168	7.83044	8.01688	10.7457	18.6439	10.7626	31.9658	11.1863	18.6608	4.2203	11.1863	3.76268	8.01688	5.71181	3.98301	6.28808	4.05081	8.61009
Ranguba_Ken river	NC 1121	3	1.88	15.4	14.72	24.92	40.32	27.88	75	24.6	40.24	10.56	22.96	8.72	14.76	13	6.92	12.52	7	17.64
Ranguba_Ken river	NC 1122	3	2.14284	14.6427	14.3213	23.0355	37.9283	25.1427	68.8566	19.0356	37.9997	9.85706	20.357	8.96421	14.3213	12.7856	4.82139	12.6428	4.89282	16.1427
Ranguba_Ken river	NC 1123	3	0.692316	16.654	13.8463	22.3464	42.3082	23.0387	72.7701	22.231	42.3082	6.30777	22.4618	6.34623	13.8848	12.154	5.11545	13.2694	5.11545	17.7694
Ranguba_Ken river	NC 1124	3	0.635158	7.05431	5.02721	8.14894	12.6491	8.32462	22.717	8.13543	12.6761	3.98663	7.86515	3.40553	4.95964	4.94612	2.05413	5.5948	2.05413	7.21648
Ranguba_Ken river	NC 1125	3	1.1129	7.03224	6.69353	10.5968	16.6774	11.2097	30.8225	8.40321	16.6935	4.66128	10.4839	3.80644	6.67741	5.54838	2.93548	5.79031	2.96774	7.93547
Ranguba_Ken river	NC 1126	3	1.34547	8.74554	7.12734	11.2547	17.8547	11.4365	31.7458	9.94555	17.8729	4.96369	11.1637	4.20004	7.10916	6.63643	3.34549	7.03643	3.38185	9.34555
Ranguba_Ken river	NC 1127	3	1.74225	6.7266	6.46905	8.59005	15.1954	8.62035	27.6184	8.3628	15.2106	3.28755	9.7869	2.7573	6.4539	4.6056	3.2724	5.19645	3.25725	7.1205
Ranguba_Ken river	NC 1128	3	1.1111	4.99995	4.46662	5.73328	10.0666	6.07772	18.1998	5.19995	10.0666	2.76664	6.7666	2.27775	4.42218	3.04441	2.0222	3.57774	2.0222	5.13328
Ranguba_Ken river	NC 1129	3	0.768129	7.72477	6.01459	9.71031	14.9278	9.65234	26.7976	8.81174	14.9278	4.26094	9.84075	3.79717	6.0001	5.52183	2.50729	6.30445	2.53627	8.21753
Ranguba_Ken river	NC 1130	3	1.40625	12.3125	12.5	19.4688	34.1562	21	60.8438	15.4688	34.1562	7.59375	18.5	7.09375	12.4688	10.375	5.3125	10.4375	5.40625	14.0312
Ranguba_Ken river	NC 1192	3	2.72872	24.9367	11.2931	29.7457	28.6921	30.7183	50.9541	28.3679	28.7461	20.1006	16.6155	19.7224	11.2931	22.6402	5.34937	22.9644	5.32235	26.2335
Ranguba_Ken river	NC 1193	3	0.939393	24.3939	13.1818	35.6666	33.2424	35.3636	58.9393	26.606	33.1515	22.2424	18.4848	21.9697	13.2727	25.0606	5.72727	23.4545	5.75757	27.6666
Ranguba_Ken river	NC 1194	3	1.17795	36.4797	13.8777	45.2775	37.2159	46.6763	65.0082	37.4368	37.1791	31.4366	18.5896	31.2893	14.0618	34.9704	5.92657	34.4183	5.92657	38.6147
Ranguba_Ken river	NC 1195	3	0.655177	31.6554	13.6208	39.552	39.5175	41.4486	67.4832	33.6554	39.3106	26.0002	21.2415	25.3105	13.5518	29.4485	5.34487	28.9657	5.37935	33.483
Ranguba_Ken river	NC 1196	3	1.5357	30.8926	14.7142	41.1425	38.7497	43.4639	66.8923	32.3569	38.8568	28.6783	21.2855	27.1784	14.8927	29.7498	6.71423	29.0712	6.6428	33.7497
Lagarghat_Ranguwa_Ken river	NC 1247	3	2.80558	28.6113	10.9445	35.3614	26.1947	37.5836	44.2504	31.5558	26.1391	27.5002	15.7779	26.3613	11.0556	27.8891	5.50004	27.2502	5.5556	30.0558
Lagarghat_Ranguwa_Ken river	NC 1248	3	2.47825	26.3477	8.6956	30.4346	19.6086	30.9346	32.9128	30.1955	19.6303	23.9129	11.0652	23.8477	8.67386	25.4998	4.67389	25.1303	4.69562	27.4564
Lagarghat_Ranguwa_Ken river	NC 1249	3	0.931807	14.7498	9.29534	22.0452	26.9088	22.4997	50.0221	10.8408	26.9088	11.068	12.7953	11.6817	9.20444	14.2044	4.11359	13.6135	4.15904	17.0452
Lagarghat_Ranguwa_Ken river	NC 1250	3	1.15385	22.5128	10.4872	29.4102	26.6923	30.0256	49.5641	25	26.7179	19.3333	14.7436	19.1025	10.5641	21.0769	4.35897	21.0256	4.38461	24.3846
Lagarghat_Ranguwa_Ken river	NC 1251	3	0.977261	17.0452	11.7499	23.477	28.4542	24.1815	49.5449	22.6588	28.4997	13.3635	15.6362	12.4999	11.818	15.2953	4.43177	14.9998	4.45449	18.4316
Lagarghat_Ranguwa_Ken river	NC 1252	3	1.19511	23.9022	10.7804	27.2436	26.9997	26.9022	48.0727	27.3168	27.0241	16.4389	15.2925	16.1706	10.8048	20.0242	3.39021	20.9754	3.43899	24.6827
Lagarghat_Ranguwa_Ken river	NC 1253	3	1.34375	26.6875	13.8125	35.4062	36.2812	36.125	63.7812	33.5938	36.3438	21.8438	20.3125	20.7188	13.7812	24.7188	6	24.25	6.0625	28.8125
Lagarghat_Ranguwa_Ken river	NC 1254	3	1.2353	34.1473	10.5001	36.8826	28.2061	38.4121	50.118	37.5003	28.2061	26.8237	15.9707	25.7355	10.4707	29.2944	3.76474	31.4708	3.82356	34.6473
Lagarghat_Ranguwa_Ken river	NC 1255	3	1.50001	20.9708	13.0883	29.6179	35.3826	30.7061	62.9123	26.3237	35.3238	17.6766	19.8531	16.8531	13.0589	18.8237	5.79416	18.7354	5.79416	23.1767
Lagarghat_Ranguwa_Ken river	NC 1256	3	1.12501	42.7503	13.5834	53.5421	37.4586	56.2088	69.4172	54.7504	37.5003	40.167	19.9168	38.5003	13.5418	42.542	5.62505	41.3753	5.66671	45.792
Lagarghat_Ranguwa_Ken river	NC 1257	3	1.03569	16.0078	7.83127	20.0597	20.95	20.95	36.2492	20.5503	20.9864	12.828	12.1557	11.8105	7.83127	14.0091	3.43413	14.4088	3.47047	16.8254
Lagarghat_Ranguwa_Ken river	NC 1258	3	0.999992	38.964	13.1428	47.2496	35.1783	48.2139	58.9281	47.2496	35.214	34.3569	19.7141	32.964	13.0356	37.0354	5.3571	36.6783	5.3571	40.8211
Uzan Bazar_Guwahati_Brahamaputra	NC 1131	4	2.01866	19.2842	9.80834	25.2452	27.0976	27.8338	46.5243	17.7405	27.1689	17.1468	16.1731	15.5318	9.76084	17.8117	4.51231	17.6455	4.53606	20.5666
Uzan Bazar_Guwahati_Brahamaputra	NC 1132	4	1.52942	27.5002	10.5589	32.2356	32.7356	34.0297	57.2946	27.4414	32.8532	20.3237	18.2649	19.5002	10.5001	24.1178	4.4118	24.8826	4.47062	28.3826
Uzan Bazar_Guwahati_Brahamaputra	NC 1133	4	0.75	22.675	8.7	27.45	26.5	29.15	48.025	22.55	26.55	17.5	13.725	17.15	8.7	20.275	3	20.45	3.025	23.575
Uzan Bazar_Guwahati_Brahamaputra	NC 1135	4	1.49741	28.4802	11.2746	35.9379	29.4491	38.4042	51.2349	33.589	29.4784	25.4853	18.9085	22.5199	11.304	27.0121	5.02073	26.4836	4.99137	30.1831
Uzan Bazar_Guwahati_Brahamaputra	NC 1136	4	2.28125	31.375	11.6875	39.9375	30.4062	41.8438	53	31.5312	30.4375	28.9375	16.9375	27.75	11.8125	30.7812	5.53125	30	5.53125	33.375
Uzan Bazar_Guwahati_Brahamaputra	NC 1137	4	1.56757	27.5675	10.6757	34.9729	26.8919	36.4324	47.1621	31.2702	26.8108	25.2432	16.1892	23.7297	10.6216	26.6486	5	25.9189	5	29.4594
Uzan Bazar_Guwahati_Brahamaputra	NC 1138	4	2.51612	32.1935	12.7419	39.2902	31.0645	41.1935	55.258	34.0644	31.0967	27.9999	17.4838	26.9677	12.8064	30.0645	5.80644	29.8709	5.77418	33.6774
Uzan Bazar_Guwahati_Brahamaputra	NC 1139	4	2.05128	18.641	10.8718	25.4615	29.4359	27.0256	51.0256	21.4359	29.4615	14.6923	15.5128	14.2308	10.9487	17.3333	5.17948	16.9487	5.17948	20.2051
Uzan Bazar_Guwahati_Brahamaputra	NC 1140	4	2.6571	23.9711	12.4855	34.4281	29.4853	36.428	50.6278	27.5996	29.4853	24.6282	17.5997	22.9425	12.4284	25.0282	6.28562	23.1425	6.28562	27.1425
Dhuburi_Brahamaputra	NC 1141	4	1.74193	34.129	11.4838	40.3225	33.0967	42.387	56.5483	39.4193	33.1612	27.9677	17.6451	26.9677	11.5161	31.5483	4.90322	32.0645	4.96773	35.6773
Dhuburi_Brahamaputra	NC 1142	4	0.727272	33.4545	9.57575	38.4242	30.0909	39	52.6363	35.1818	30.0606	25.6666	14.8485	26	9.63635	30.4242	3.33333	31.3333	3.33333	34.4848
Dhuburi_Brahamaputra	NC 1143	4	2.2059	26.2649	11.5883	33.5885	30.2355	35.3532	54.6475	29.1767	30.3238	22.8237	16.7648	22.1472	11.6472	25.059	5.41181	24.5296	5.50004	27.9708
Dhuburi_Brahamaputra	NC 1145	4	1.88569	26.1996	11.7998	33.3709	28.6281	34.2566	50.4278	26.3425	28.7139	22.5139	15.6283	21.7711	11.7427	24.7425	4.8285	24.0568	4.8285	27.5996
Dhuburi_Brahamaputra	NC 1147	4	1.79413	29.9708	10.6766	36.0885	27.8532	37.1768	50.1475	33.6767	27.8238	25.7061	15.206	24.912	10.7648	28.2355	4.97063	28.059	4.97063	31.2944
Uzan Bazar_Guwahati_Brahamaputra	NC 1149	4	2.33269	11.4492	11.3302	18.2807	32.4197	20.542	55.699	13.8533	32.4435	6.61723	18.2331	5.47469	11.4492	9.66402	5.33187	9.37838	5.33187	12.9488
Uzan Bazar_Guwahati_Brahamaputra	NC 1150	4	1.39329	17.1133	13.9027	25.988	38.3459	28.9866	67.6656	19.9605	38.3459	12.3579	20.6268	11.0555	13.9329	14.781	5.42173	14.2964	5.39144	18.8095
Ganga_Farakka_Baraj market	NC 1153	5	0.590915	6.13643	5.27278	9.54555	14.4092	10.5001	25.0457	7.81826	14.4092	4.68187	7.72735	4.22731	5.04551	6.00006	2.40911	5.50005	2.45457	7.18189
Ganga_Farakka_Baraj market	NC 1154	5	1.8	5.05	6.75	9.1	16.75	10.7	29.8	7.9	16.85	4.2	9.55	3.15	6.95	4.7	3.5	4.3	3.5	6.15
Ganga_Farakka_Baraj market	NC 1155	5	0.8	5.72	5.36	8.88	13.56	9.64	23.96	6.6	13.56	3.8	7.44	3.48	5.36	4.96	2.56	4.92	2.68	6.68
Ganga_Farakka_Baraj market	NC 1159	5	1.86366	6.22734	5.81824	8.86373	14.7729	9.68192	25.7275	7.22734	14.8638	3.6364	8.50009	3.40912	5.90915	4.9546	3.13639	5.27278	3.18185	6.68189
Ganga_Farakka_Baraj market	Nc 1220	5	3.00002	8.3489	11.0699	13.7676	26.2095	15.1397	45.3259	8.90705	26.163	5.18609	15.0466	4.37213	11.1861	6.7675	5.69772	6.62796	5.74423	9.6745
Ganga_Farakka_Baraj market	Nc 1221	5	1.48	23.7	7.34	27.54	18.24	28.12	32.18	25.54	18.3	21.48	11.32	20.46	7.46	22.46	3.84	22.48	3.86	24.84
Ganga_Farakka_Baraj market	Nc 1222	5	2.38213	41.0757	10.9449	46.516	28.5534	48.1255	49.0591	40.6894	28.5534	36.4402	16.0955	35.6354	10.9771	38.8223	5.0218	38.9511	5.05399	42.138
Ganga_Farakka_Baraj market	Nc 1223	5	1.22193	19.5954	8.46468	26.3271	22.5725	27.1047	41.2125	22.8835	22.528	17.7736	12.7303	17.1515	8.39803	19.3288	4.19901	18.5512	4.1768	21.8615
Ganga_Farakka_Baraj market	Nc 1226	5	2.4689	18.1269	10.482	22.6099	25.4686	23.9093	44.7434	23.9526	25.5336	14.3802	14.7051	13.4057	10.5903	15.7013	5.26265	16.1128	5.26265	19.1664
Ganga_Farakka_Baraj market	Nc 1227	5	1.18606	22.9769	8.74426	27.9072	24.2328	28.5816	43.5817	27.8607	24.2095	19.0467	13.0931	18.4188	8.9303	21.0699	3.95352	21.2327	3.95352	24.256
Ganga_Farakka_Baraj market	NC 1160	5	0.21739	4.7391	5.17388	8.43473	14.3043	9.39125	25.6085	4.91301	14.2608	3.34781	7.913	2.60868	5.17388	4.52171	1.95651	4.26084	1.99999	5.91301
Manikchak_Malda_Ganga	NC 1164	5	0.575757	3.66666	3.57575	5.57575	9.42423	6.33333	17.0606	3.87878	9.45454	2.24242	5.0303	1.93939	3.66666	3.0303	1.48485	3.0303	1.51515	3.96969
Manikchak_Malda_Ganga	NC 1165	5	0.529416	3.70591	3.52944	5.3824	9.7942	6.05887	17.3825	3.55885	9.88243	2.08825	5.3824	1.79413	3.52944	2.85296	1.61766	2.91179	1.73531	4.11768
Gomti river	nc 1197	6	0.673909	23.7825	7.43474	29.7824	19.6086	31.5433	35.7389	25.3477	19.6303	23.3477	10.8478	21.4564	7.49995	23.1086	2.97824	22.652	3.02172	25.5216
Gomti river	nc 1198	6	1.43138	18.4119	8.00006	23.6472	20.1374	24.9218	35.863	18.8825	20.1178	17.059	12.3726	15.8825	8.00006	17.3727	3.6667	17.2354	3.6863	19.9413
Gomti river	nc 1199	6	2.10202	24.959	8.87748	29.2038	20.0815	29.8161	32.7344	25.1835	20.1019	22.2039	11.1836	21.4488	8.9183	23.4692	4.55098	23.51	4.55098	26.1018
Gomti river	nc 1203	6	1.5965	17.6142	7.42111	20.8247	19.4037	21.5967	33.6669	17.2282	19.4563	14.351	11.1404	13.6141	7.4562	15.5615	3.45617	16.0528	3.47371	18.4387
Gomti river	nc 1204	6	1.27081	20.7497	8.1457	25.2913	21.458	26.0204	38.4369	20.9163	21.4163	17.6247	11.9998	16.7914	8.10404	19.208	3.60411	19.333	3.64577	21.9788
Gomti river	nc 1205	6	1.76472	22.5688	7.39222	25.9806	18.7452	26.7845	32.9218	23.2551	18.6864	19.7845	11.1766	19.0198	7.6079	21.0002	3.78434	21.3335	3.80395	23.4904
Gomti river	nc 1206	6	1.13558	17.2371	6.79655	21.6269	17.1015	22.6439	29.8811	18.288	17.0846	16.2202	10.1525	14.9999	6.79655	16.4066	3.20336	16.2371	3.23726	18.5592
Gomti river	nc 1207	6	1.28848	20.8656	7.25009	24.3849	19.4425	25.5965	34.385	20.8272	19.5002	17.9618	11.1924	16.9425	7.28855	19.0195	3.26927	19.5195	3.30773	21.8272
Gomti river	nc 1210	6	1.80771	22.3272	7.53855	25.4234	17.6348	26.308	30.3465	23.5772	17.6541	19.1348	10.8078	18.0964	7.6924	20.1733	3.76928	20.6349	3.82697	23.0003
Gomti river	nc 1211	6	0.9	20.56	7.48	24.08	21	25.4	37.2	22.5	21.04	17.02	12.02	15.66	7.52	18.26	3.18	19.18	3.2	21.6
Gomti river	nc 1212	6	0.836372	15.5274	7.0728	18.8547	19.7638	19.4002	35.4004	17.5638	19.7638	11.9638	11.0365	11.1819	7.01825	13.1092	3.00003	13.9274	2.98185	16.382
Gomti river	nc 1213	6	1.32652	19.306	7.67341	23.9386	21.408	25.408	37.6528	20.7345	21.4488	17.2039	11.8162	16.0611	7.71422	18.1427	3.63262	18.2243	3.65303	20.6937
Gomti river	nc 1214	6	2.01693	15.8982	7.49146	18.5592	19.2202	19.4236	33.9658	17.6778	19.2032	12.1355	11.3897	11.2711	7.50841	13.6439	3.76268	14.5253	3.76268	16.5083
Gomti river	nc 1215	6	1.56248	22.7705	7.99987	27.6871	20.5413	28.4579	35.5619	23.8955	20.5622	20.6038	11.1248	19.833	8.06237	21.9163	4.08327	21.5622	4.08327	24.3329
Gomti river	NC 1241	6	2.39129	7.32604	6.60866	8.15212	13.9782	7.67387	23.0868	7.71734	14.0434	3.49998	8.54343	3.4565	6.65213	4.89128	3.41302	5.93475	3.52172	7.56517
Gomti river	NC 1242	6	1.06897	7.65523	7.48281	10.7932	20.6553	11.3104	35.3796	12.7587	20.6553	3.93106	12.3449	2.79312	7.62074	5.31038	3.27589	5.72418	3.34485	8.58627
Gomti river	NC 1243	6	1.00001	8.3104	7.55178	11.5518	20.0001	11.207	34.0002	12.9656	20.0001	3.96555	11.0001	3.93106	7.55178	5.82763	3.10347	6.58625	3.17244	9.20696
Gomti river	NC 1244	6	1.44829	6.4828	7.48281	9.10351	17.1725	10.1035	29.9312	6.65522	17.276	4.41382	10.9656	3.06899	7.72419	4.48279	3.37933	4.79314	3.48278	7.06902
Gomti river	NC 1245	6	0.774192	6.4516	6.93547	9.35482	16.9677	9.87095	29.129	8.90321	17.0322	3.96773	9.93546	2.77419	6.93547	4.77418	2.58064	4.96773	2.67741	7.25805
Gomti river	NC 1246	6	0.470592	3.6863	4.4118	6.64711	11.8628	6.56868	20.3531	3.84317	11.9217	2.33335	6.19613	2.41178	4.49023	3.21571	1.94119	3.05885	1.92158	4.56866
Gandak river_Valmiki nagar	NC 1259	7	2.225	25.425	10.5	29.85	28.55	29.9	46.875	29.325	28.55	18.8	14.95	19.05	10.45	22.725	5.05	23.175	5.075	26.3
Gandak river_Valmiki nagar	NC 1260	7	0.883728	24.5118	8.20937	28.4886	23.3723	29.1863	41.0003	29.4886	23.3955	19.4885	12.1861	18.9071	8.30239	22.0932	3.20933	22.6979	3.20933	25.4886
Gandak river_Valmiki nagar	NC 1261	7	1.09303	18.1397	9.04658	24.5118	25.0235	26.349	45.0701	24.9537	25.0002	14.9769	14.1629	13.9536	9.0931	16.6513	3.97678	16.5583	4.04654	19.8839
Gandak river_Valmiki nagar	NC 1262	7	2.39537	24.1397	9.97682	26.9072	26.0235	27.977	43.9306	28.3491	26.0932	17.9769	15.3722	16.8373	10.1396	20.7444	4.74422	21.8606	4.74422	24.6281
Gandak river_Valmiki nagar	NC 1263	7	2.44446	37.5559	9.63897	41.6392	23.2502	43.0281	38.6114	44.167	23.278	33.7225	14.0001	32.5558	9.58341	35.0558	4.80559	35.6947	4.80559	38.5281
Gandak river_Valmiki nagar	NC 1264	7	0.938768	18.0815	8.10198	21.6529	23.857	23.1223	40.6323	22.4692	23.8978	13.2856	12.9591	12.7754	8.10198	15.4284	3.3061	16.2856	3.36732	19.0611
Gandak river_Valmiki nagar	NC 1265	7	1.2353	35.0003	9.64714	40.2062	26.1179	41.765	45.1768	41.6474	26.1767	30.765	15.0295	29.7355	9.70596	32.6179	3.9118	32.912	3.94121	36.1473
Gandak river_Valmiki nagar	NC 1266	7	1.45453	31.0678	7.09082	32.8405	19.5225	33.795	33.2269	34.6587	19.4998	25.8179	11.159	25.0679	7.09082	27.9997	3.02269	29.0906	3.04542	31.4769
Gandak river_Valmiki nagar	NC 1267	7	1.74359	30.4871	8.92307	34.2051	23.6923	35.3589	41.3077	34.4615	23.7179	25.9231	13.3333	25.0513	8.79486	27.6923	4.15384	28.8718	4.20512	31.3077
Gandak river_Valmiki nagar	NC 1268	7	1.65712	39.4851	8.68558	43.2565	23.3139	44.3993	40.6565	43.9708	23.4282	34.7138	13.4855	33.5709	8.71415	36.828	4.08565	37.7423	4.11422	40.3423
