# Supplementary material for: Phenotypic variation of Chitala chitala (Hamilton, 1822) from Indian rivers using truss network and geometric morphometrics
Source: PeerJ. 2022 Apr 18;10:e13290. doi: 10.7717/peerj.13290 (PMC9022642; doi:10.7717/peerj.13290)
Supplement: Supplemental Information 19 [file peerj-10-13290-s019.xlsx]

## Sheet: Truss_data
			Truss_distance
FISH CODE	LOCATION	Location	1_2	1_3	1_5	1_6	1_7	1_8	1_9	2_3	2_4	2_5	2_6	2_7	2_8	2_9	3_4	3_5	3_6	3_7	3_8	3_9	4_5	4_6	4_7	4_8	4_9	5_6	5_7	5_8	5_9	6_7	6_8	6_9	7_8	7_9	8_9
NC 1100	Son River	1	0.933833	1.35846	1.3519	1.13195	0.907233	0.513076	0.436747	1.16572	1.53314	1.21648	1.02667	0.827438	0.890778	0.772769	1.29622	0.955898	1.16696	1.22277	1.32046	1.30307	0.933833	1.4798	0.933833	1.59371	1.59165	1.00044	1.16519	1.29351	1.30216	0.742773	1.0169	1.06449	0.703845	0.784406	0.437443
NC 1101	Son River	1	0.963302	1.38785	1.37525	1.08325	0.884093	0.423862	0.425486	1.20289	1.52795	1.25427	0.983694	0.776955	0.917631	0.818731	1.25252	0.993177	1.19953	1.24347	1.35346	1.33857	0.963302	1.49424	0.963302	1.59715	1.59283	1.08242	1.20529	1.32738	1.33289	0.680611	0.977652	1.01274	0.722918	0.743876	0.371625
NC 1001	Son River	1	0.974157	1.35444	1.32884	1.10146	0.873345	0.454273	0.486754	1.143	1.53011	1.2049	1.0152	0.807052	0.925721	0.806284	1.30722	1.0186	1.16258	1.20916	1.31508	1.29203	0.974157	1.48474	0.974157	1.59422	1.58967	0.957669	1.14137	1.2697	1.27724	0.738633	0.991827	1.02951	0.686188	0.719411	0.421882
NC1105	Son River	1	0.973764	1.37745	1.37647	1.13715	0.943453	0.510957	0.458188	1.16936	1.52326	1.23465	1.00469	0.810795	0.914005	0.817345	1.28241	1.00475	1.17474	1.22486	1.33746	1.32206	0.973764	1.47109	0.973764	1.5919	1.59085	1.02687	1.17858	1.31873	1.32945	0.705655	1.02353	1.06791	0.760003	0.821537	0.428114
NC1106	Son River	1	0.947086	1.37193	1.36858	1.1223	0.914112	0.496745	0.446339	1.18075	1.53229	1.23907	0.999355	0.793409	0.900513	0.785731	1.28713	0.983474	1.16354	1.22351	1.33436	1.31749	0.947086	1.47458	0.947086	1.59361	1.59178	1.02442	1.1819	1.31305	1.32209	0.714943	1.01062	1.05186	0.731261	0.784659	0.437283
NC1107	Son River	1	0.999259	1.37379	1.3577	1.11925	0.916612	0.529357	0.524881	1.16105	1.52524	1.22423	1.00822	0.837903	0.951841	0.826835	1.28793	0.988	1.15602	1.21982	1.33046	1.30869	0.999259	1.47179	0.999259	1.59006	1.58665	0.997144	1.16363	1.29413	1.30222	0.705865	0.995667	1.03442	0.715871	0.759567	0.478973
NC1108	Son River	1	0.926894	1.36327	1.36315	1.10865	0.874383	0.531151	0.466579	1.18351	1.53728	1.25257	1.02591	0.804234	0.891789	0.751705	1.28793	1.00807	1.17651	1.22812	1.32307	1.30481	0.926894	1.48953	0.926894	1.59282	1.58984	1.03301	1.19314	1.30172	1.31427	0.745482	0.98038	1.03619	0.651555	0.724834	0.46763
NC1109	Son River	1	0.952753	1.36196	1.36228	1.11788	0.924712	0.527254	0.461448	1.16153	1.52757	1.22722	0.99498	0.827179	0.895421	0.788125	1.28669	0.969139	1.15391	1.21396	1.31801	1.30379	0.952753	1.48182	0.952753	1.59151	1.58992	1.01954	1.16826	1.30002	1.31204	0.677063	0.992868	1.0419	0.718166	0.797461	0.42998
NC1110	Son River	1	0.991077	1.38564	1.38635	1.12437	0.950442	0.53895	0.499997	1.18341	1.52346	1.25404	1.01184	0.838691	0.933706	0.824785	1.26341	0.971088	1.17253	1.22192	1.33946	1.3261	0.991077	1.47372	0.991077	1.58876	1.58823	1.06025	1.18851	1.32464	1.33674	0.662053	0.99652	1.04787	0.755616	0.818152	0.461484
NC1111	Son River	1	0.954696	1.37773	1.38125	1.16095	0.945769	0.538222	0.467449	1.18099	1.52499	1.24088	1.02735	0.811598	0.890272	0.785155	1.26947	0.97204	1.16479	1.22707	1.33475	1.32112	0.954696	1.46673	0.954696	1.59085	1.5898	1.01717	1.18653	1.3209	1.33305	0.758186	1.04593	1.09445	0.746622	0.826546	0.456707
NC1112	Son River	1	0.931289	1.37589	1.37777	1.10348	0.909901	0.522676	0.465828	1.1932	1.53169	1.25255	0.983707	0.795691	0.875249	0.752261	1.27091	0.993975	1.18478	1.2361	1.33513	1.31942	0.931289	1.48885	0.931289	1.59249	1.59001	1.06742	1.19886	1.31906	1.3305	0.669063	0.975681	1.02961	0.70193	0.781281	0.454226
NC1113	Son River	1	1.07121	1.37804	1.34692	1.07857	0.923594	0.535204	0.653648	1.14166	1.50652	1.2196	1.00206	0.873346	1.01734	0.861573	1.26115	0.978893	1.15227	1.20125	1.32483	1.29498	1.07121	1.48691	1.07121	1.58745	1.57726	1.0116	1.1424	1.27506	1.28504	0.605791	0.933892	0.9819	0.721562	0.744258	0.583036
NC 1166	BANSAGAR_MAIHAR_M.P.	1	0.964667	1.38304	1.38162	1.14265	0.919679	0.569981	0.511719	1.19422	1.53092	1.26372	1.05101	0.872203	0.92823	0.784526	1.27036	1.01081	1.18359	1.24748	1.34046	1.32067	0.964667	1.47187	0.964667	1.58917	1.58663	1.03392	1.20077	1.31711	1.32886	0.749839	1.01302	1.06613	0.688206	0.782711	0.506131
NC 1167	BANSAGAR_MAIHAR_M.P.	1	0.973903	1.3799	1.37283	1.12599	0.922437	0.55511	0.51656	1.17862	1.52441	1.24147	1.00812	0.827375	0.925379	0.79509	1.27087	1.00982	1.17607	1.23438	1.33764	1.31641	0.973903	1.47704	0.973903	1.59035	1.58592	1.02713	1.18405	1.30884	1.3178	0.708659	0.996582	1.04063	0.708907	0.768677	0.480141
NC 1168	BANSAGAR_MAIHAR_M.P.	1	0.986947	1.39446	1.3911	1.15222	0.932336	0.518951	0.506989	1.19887	1.52378	1.25962	1.03447	0.824595	0.929194	0.813978	1.25119	0.976931	1.17291	1.24205	1.35153	1.3358	0.986947	1.46365	0.986947	1.59058	1.5882	1.0381	1.20648	1.33336	1.34274	0.765452	1.04001	1.08255	0.738645	0.797242	0.465731
NC 1169	BANSAGAR_MAIHAR_M.P.	1	0.94838	1.39285	1.38561	1.12307	0.880271	0.491051	0.500043	1.22021	1.53456	1.2727	1.02118	0.803907	0.890681	0.761222	1.25131	0.991798	1.18446	1.25862	1.35097	1.33503	0.94838	1.4761	0.94838	1.59196	1.58871	1.05635	1.22294	1.32981	1.33835	0.766613	1.00963	1.05099	0.668913	0.732071	0.436538
NC 1170	BANSAGAR_MAIHAR_M.P.	1	1.01144	1.38981	1.37452	1.15379	0.948938	0.495673	0.444209	1.17373	1.51349	1.23073	1.03376	0.847535	0.980303	0.876017	1.25112	0.993609	1.17278	1.23292	1.35743	1.33796	1.01144	1.46822	1.01144	1.59677	1.59144	0.998823	1.17181	1.32234	1.32907	0.742829	1.05463	1.08869	0.794053	0.829995	0.470355
NC 1171	BANSAGAR_MAIHAR_M.P.	1	0.955685	1.39144	1.39771	1.13801	0.943264	0.526162	0.375887	1.20828	1.5262	1.27298	1.03108	0.835235	0.940387	0.82779	1.24312	0.978684	1.19168	1.24264	1.3619	1.3474	0.955685	1.48133	0.955685	1.5984	1.59517	1.07854	1.21238	1.34903	1.35922	0.708331	1.03011	1.07863	0.781803	0.83902	0.484443
NC 1172	BANSAGAR_MAIHAR_M.P.	1	1.00695	1.38952	1.37817	1.10926	0.935659	0.541287	0.506112	1.18191	1.51716	1.24514	1.01331	0.858741	0.96649	0.848288	1.2494	0.987759	1.19023	1.2356	1.34822	1.32915	1.00695	1.48546	1.00695	1.59175	1.58668	1.05926	1.18427	1.31716	1.3255	0.648032	0.978487	1.02534	0.741635	0.790081	0.479718
NC 1173	BANSAGAR_MAIHAR_M.P.	1	1.03139	1.3911	1.36663	1.11144	0.911889	0.479276	0.542908	1.18145	1.5287	1.24364	1.03243	0.843307	0.97347	0.86381	1.28216	0.998715	1.18009	1.23402	1.3467	1.32734	1.03139	1.47041	1.03139	1.59012	1.58768	1.02403	1.18233	1.3083	1.31435	0.726325	0.997239	1.03128	0.726217	0.741999	0.42861
NC 1174	BANSAGAR_MAIHAR_M.P.	1	0.991595	1.3928	1.37808	1.1275	0.912608	0.518499	0.510259	1.19518	1.53073	1.24846	1.01728	0.818681	0.937041	0.825156	1.27942	0.990807	1.18127	1.24365	1.34952	1.33207	0.991595	1.46435	0.991595	1.58857	1.58759	1.0357	1.19589	1.31771	1.32404	0.737453	1.00744	1.04245	0.711861	0.74615	0.419957
NC 1175	BANSAGAR_MAIHAR_M.P.	1	1.02084	1.39573	1.3764	1.08292	0.924222	0.584088	0.610503	1.18747	1.52859	1.24482	0.980001	0.849728	0.949706	0.814997	1.28224	0.989826	1.19236	1.24101	1.34012	1.31909	1.02084	1.47799	1.02084	1.58101	1.58029	1.07401	1.18722	1.30247	1.31029	0.59248	0.918988	0.966801	0.676658	0.728424	0.4797
NC 1176	BANSAGAR_MAIHAR_M.P.	1	1.05975	1.41651	1.39498	1.14378	0.942198	0.593063	0.649185	1.2041	1.53347	1.26339	1.02681	0.868458	0.985576	0.850303	1.29359	0.990719	1.17559	1.25454	1.35863	1.33776	1.05975	1.44473	1.05975	1.57787	1.58091	1.04129	1.20634	1.32137	1.32912	0.732505	1.00086	1.0371	0.700978	0.740344	0.512456
NC 1177	BANSAGAR_MAIHAR_M.P.	1	0.968157	1.38403	1.3954	1.13797	0.966586	0.616618	0.554602	1.18486	1.52205	1.25697	0.993126	0.805736	0.878935	0.762137	1.25942	0.973627	1.16586	1.21811	1.32642	1.31451	0.968157	1.47194	0.968157	1.58224	1.58215	1.06551	1.19452	1.3212	1.33595	0.663068	0.984465	1.04343	0.724577	0.809352	0.464609
NC 1178	BANSAGAR_MAIHAR_M.P.	1	1.03068	1.40688	1.38843	1.10857	0.918495	0.485777	0.525516	1.20454	1.53169	1.26777	1.0219	0.853444	0.979374	0.872574	1.2775	1.01319	1.20075	1.25406	1.36487	1.34705	1.03068	1.46729	1.03068	1.58918	1.58873	1.07282	1.20888	1.33232	1.33819	0.691214	0.991489	1.02448	0.736418	0.75607	0.426493
NC 1179	BANSAGAR_MAIHAR_M.P.	1	0.981708	1.4016	1.39684	1.11106	0.912825	0.523091	0.473317	1.21421	1.52963	1.27951	1.01358	0.816072	0.94119	0.8261	1.25606	1.02636	1.20944	1.2562	1.36286	1.34748	0.981708	1.47695	0.981708	1.59071	1.59006	1.09407	1.22384	1.34018	1.35093	0.701516	0.986264	1.03437	0.721696	0.765338	0.456406
NC 1180	BANSAGAR_MAIHAR_M.P.	1	0.959115	1.39123	1.38539	1.13316	0.914564	0.469928	0.4534	1.20492	1.52941	1.25875	1.01915	0.793991	0.898446	0.799493	1.26101	0.999699	1.19088	1.24637	1.35243	1.3385	0.959115	1.4731	0.959115	1.59325	1.59133	1.05158	1.20656	1.33265	1.34044	0.748295	1.02818	1.06585	0.734936	0.782135	0.38243
NC 1181	BANSAGAR_MAIHAR_M.P.	1	0.97562	1.39347	1.39654	1.13177	0.94147	0.529004	0.479102	1.20139	1.52299	1.26762	1.00723	0.815658	0.917024	0.812438	1.24492	0.983489	1.1793	1.23726	1.35001	1.33764	0.97562	1.47474	0.97562	1.59075	1.58895	1.07212	1.20949	1.3382	1.34939	0.696152	1.01042	1.0565	0.748734	0.807891	0.439117
NC 1182	BANSAGAR_MAIHAR_M.P.	1	0.971162	1.38228	1.37975	1.11363	0.917274	0.509512	0.48886	1.19107	1.53211	1.25665	0.998059	0.814691	0.912439	0.804234	1.27741	0.980797	1.16559	1.22873	1.33754	1.32336	0.971162	1.47225	0.971162	1.58958	1.58893	1.05218	1.19619	1.32041	1.32935	0.68848	0.991795	1.03044	0.718993	0.766906	0.402973
NC 1183	BANSAGAR_MAIHAR_M.P.	1	0.99095	1.39499	1.38728	1.09073	0.927378	0.529894	0.528136	1.19854	1.52719	1.25881	0.978514	0.812746	0.932703	0.810886	1.26433	0.993647	1.19608	1.24069	1.35059	1.33302	0.99095	1.48134	0.99095	1.58866	1.58694	1.08936	1.203	1.32678	1.33578	0.619913	0.955016	1.00252	0.728361	0.773343	0.468675
NC 1184	BANSAGAR_MAIHAR_M.P.	1	1.00095	1.40528	1.39809	1.14147	0.933491	0.563648	0.538326	1.2146	1.53427	1.275	1.03315	0.866226	0.949731	0.825494	1.27487	0.988082	1.18338	1.25784	1.35911	1.34301	1.00095	1.45544	1.00095	1.58523	1.58666	1.05939	1.21652	1.33497	1.34488	0.729191	1.01287	1.05607	0.713987	0.779846	0.480731
NC 1185	BANSAGAR_MAIHAR_M.P.	1	0.991661	1.39792	1.38942	1.12458	0.914851	0.526163	0.506195	1.20541	1.53153	1.27018	1.02808	0.815138	0.944182	0.826976	1.27095	1.01598	1.19486	1.24655	1.35557	1.33858	0.991661	1.46734	0.991661	1.5885	1.588	1.0632	1.21173	1.32969	1.33849	0.737513	1.00129	1.04284	0.718942	0.749564	0.443512
NC 1186	BANSAGAR_MAIHAR_M.P.	1	0.950874	1.37801	1.38376	1.12777	0.917281	0.531905	0.486692	1.19746	1.53728	1.27172	1.04227	0.79817	0.902461	0.773895	1.28063	0.992548	1.17633	1.22124	1.33365	1.31953	0.950874	1.47455	0.950874	1.58961	1.58979	1.05364	1.20313	1.32329	1.33673	0.75169	1.00362	1.05936	0.717413	0.773205	0.465899
NC 1187	BANSAGAR_MAIHAR_M.P.	1	0.9482	1.37241	1.36927	1.13779	0.921582	0.509589	0.490839	1.18078	1.52975	1.23733	1.00837	0.812552	0.874839	0.763936	1.27787	0.971731	1.15243	1.22539	1.32633	1.31211	0.9482	1.47041	0.9482	1.59031	1.58865	1.00724	1.17995	1.30822	1.31868	0.734855	1.0225	1.06468	0.71648	0.792927	0.416891
NC 1188	BANSAGAR_MAIHAR_M.P.	1	0.982095	1.39076	1.38673	1.14766	0.929247	0.538224	0.513834	1.19546	1.52628	1.25938	1.04199	0.825193	0.925556	0.805924	1.2615	0.996524	1.18148	1.23928	1.34638	1.32987	0.982095	1.46677	0.982095	1.58911	1.58718	1.03654	1.20119	1.32543	1.33571	0.763583	1.02772	1.07398	0.724301	0.782968	0.463446
NC 1189	BANSAGAR_MAIHAR_M.P.	1	0.946883	1.38046	1.38909	1.12307	0.94103	0.546761	0.448684	1.19212	1.52923	1.26005	1.00321	0.815796	0.89899	0.784508	1.26929	0.986762	1.18308	1.23088	1.34042	1.32672	0.946883	1.4803	0.946883	1.59171	1.59116	1.07166	1.20037	1.3306	1.34372	0.670376	0.996026	1.05301	0.743818	0.822344	0.473579
NC 1190	BANSAGAR_MAIHAR_M.P.	1	0.981953	1.39502	1.38112	1.19246	0.929832	0.556755	0.517327	1.19767	1.52185	1.24477	1.06219	0.855414	0.931512	0.806612	1.24969	0.996632	1.15833	1.25756	1.35307	1.33337	0.981953	1.44672	0.981953	1.58996	1.58551	0.9553	1.19491	1.31824	1.32543	0.849773	1.08371	1.11553	0.71146	0.784028	0.47087
NC 1191	BANSAGAR_MAIHAR_M.P.	1	1.00075	1.39657	1.38834	1.14866	0.947635	0.560324	0.515305	1.19206	1.52224	1.24942	1.02702	0.852187	0.955819	0.833861	1.26075	0.982921	1.1799	1.24488	1.3552	1.33605	1.00075	1.46145	1.00075	1.58909	1.58688	1.03652	1.19487	1.32722	1.33544	0.726146	1.02637	1.06888	0.748366	0.806311	0.498944
Nc 1230	BANSAGAR_MAIHAR_M.P.	1	0.890616	1.3598	1.35186	1.0778	0.852027	0.441638	0.403575	1.18984	1.54526	1.23415	0.963456	0.729153	0.840999	0.721943	1.30908	0.984297	1.17269	1.22801	1.32509	1.30932	0.890616	1.48968	0.890616	1.59597	1.59506	1.03883	1.18679	1.30044	1.30922	0.702673	0.967684	1.01135	0.664843	0.718985	0.390929
Nc 1231	BANSAGAR_MAIHAR_M.P.	1	1.01199	1.3958	1.3824	1.11047	0.926283	0.494667	0.466352	1.1914	1.527	1.26216	1.03226	0.859874	0.97628	0.870743	1.27208	1.03328	1.20615	1.24505	1.35911	1.34217	1.01199	1.47594	1.01199	1.59212	1.59141	1.06458	1.1951	1.32731	1.33759	0.680544	0.994052	1.03966	0.753479	0.793407	0.451832
Nc 1232	BANSAGAR_MAIHAR_M.P.	1	0.961795	1.37133	1.35481	1.11391	0.906655	0.47554	0.441394	1.1723	1.53019	1.22073	1.00162	0.811346	0.91626	0.811322	1.29089	0.989621	1.17262	1.22721	1.33504	1.31721	0.961795	1.47838	0.961795	1.59447	1.59177	1.00638	1.16481	1.29968	1.30619	0.70626	1.00481	1.04054	0.727558	0.771332	0.397156
Nc 1233	BANSAGAR_MAIHAR_M.P.	1	0.976302	1.38781	1.37958	1.1051	0.914157	0.488715	0.477688	1.19498	1.5271	1.25087	0.985752	0.818799	0.927497	0.812436	1.26135	0.978372	1.17855	1.24033	1.34887	1.3321	0.976302	1.47924	0.976302	1.59319	1.59026	1.06102	1.19819	1.32505	1.33309	0.668621	0.989626	1.02976	0.730924	0.782027	0.450343
Nc 1234	BANSAGAR_MAIHAR_M.P.	1	1.00655	1.40031	1.37997	1.12944	0.908334	0.572048	0.573531	1.20297	1.52985	1.25971	1.03296	0.846879	0.962674	0.814975	1.26989	1.02304	1.19074	1.2557	1.35463	1.33103	1.00655	1.46392	1.00655	1.58539	1.58298	1.03272	1.20109	1.31205	1.32063	0.747748	0.993699	1.03665	0.680779	0.723211	0.518872
NC 1500	Tons	2	1.03214	1.38916	1.36694	1.10092	0.915842	0.480296	0.521647	1.1742	1.52926	1.24268	1.03123	0.876787	0.982615	0.87486	1.29137	1.00896	1.19192	1.23637	1.34671	1.32765	1.03214	1.47411	1.03214	1.58997	1.58928	1.04061	1.1768	1.30866	1.31634	0.672126	0.982616	1.024	0.731356	0.76967	0.441727
NC 1501	Tons	2	0.982713	1.3873	1.39722	1.14016	0.949111	0.517904	0.458545	1.18978	1.51947	1.27363	1.04214	0.823216	0.940005	0.830052	1.24579	1.0034	1.18617	1.22263	1.34782	1.33422	0.982713	1.48386	0.982713	1.59425	1.59066	1.0719	1.20527	1.34185	1.35541	0.724456	1.0253	1.07994	0.77709	0.831469	0.482818
NC 1502	Tons	2	0.953201	1.37092	1.36481	1.07931	0.858359	0.464791	0.486375	1.19411	1.53915	1.26425	1.01975	0.821772	0.899621	0.774733	1.2816	0.998635	1.18258	1.23372	1.32697	1.31294	0.953201	1.49289	0.953201	1.59222	1.59083	1.06211	1.20271	1.30794	1.32051	0.707491	0.958481	1.0134	0.64628	0.717817	0.423196
NC 1503	Tons	2	0.868358	1.36242	1.38445	1.09428	0.884391	0.460541	0.33641	1.20354	1.5448	1.28074	0.995632	0.7718	0.829751	0.718903	1.28653	1.01218	1.18776	1.23118	1.32996	1.31986	0.868358	1.49759	0.868358	1.59798	1.59806	1.09674	1.22149	1.33648	1.35097	0.689609	0.984041	1.04287	0.702906	0.789024	0.413313
NC 1504	Tons	2	1.08246	1.39879	1.35524	1.10596	0.934776	0.541275	0.656351	1.15611	1.52784	1.21334	1.03084	0.909049	1.01843	0.879425	1.31427	1.00774	1.19124	1.23892	1.34681	1.31606	1.08246	1.46451	1.08246	1.58298	1.58209	1.00431	1.14721	1.28377	1.28716	0.649389	0.96766	1.00829	0.720174	0.758359	0.540521
NC 1505	Tons	2	1.00931	1.38505	1.36191	1.12844	0.908707	0.522569	0.546915	1.17554	1.52534	1.23643	1.05429	0.855681	0.963982	0.828313	1.27752	1.01777	1.19329	1.23782	1.34246	1.31876	1.00931	1.47393	1.00931	1.58971	1.58598	1.00616	1.17336	1.29858	1.30778	0.755723	1.00657	1.05671	0.704874	0.756399	0.508326
NC 1506	Tons	2	0.982166	1.38247	1.36309	1.07974	0.870144	0.482348	0.526037	1.19467	1.54006	1.25322	1.01658	0.824714	0.929571	0.799076	1.29452	1.00488	1.19537	1.24198	1.33867	1.31962	0.982166	1.48412	0.982166	1.58991	1.58908	1.05666	1.19502	1.30381	1.31255	0.700279	0.953645	1.00268	0.660661	0.704938	0.446578
NC 1507	Tons	2	1.04209	1.39225	1.37518	1.08753	0.913417	0.514654	0.577926	1.18681	1.53357	1.26316	1.02132	0.885817	0.99416	0.862077	1.28513	0.994239	1.17938	1.23405	1.34461	1.32402	1.04209	1.47497	1.04209	1.58689	1.58671	1.06469	1.19148	1.31249	1.32223	0.637102	0.953994	0.999522	0.711827	0.752106	0.507088
NC 1508	Tons	2	1.01119	1.38515	1.35305	1.07844	0.87367	0.510481	0.587584	1.18273	1.5329	1.23511	1.0168	0.858427	0.953102	0.809326	1.28806	1.00678	1.19607	1.24603	1.33717	1.31244	1.01119	1.48445	1.01119	1.58745	1.58405	1.03575	1.17804	1.28713	1.29361	0.682252	0.941466	0.989931	0.641976	0.695608	0.485342
NC 1509	Tons	2	0.949099	1.38705	1.36703	1.09302	0.859751	0.486983	0.48912	1.21008	1.53977	1.25219	1.01377	0.820653	0.911216	0.768382	1.28278	1.00514	1.20844	1.26303	1.35046	1.32935	0.949099	1.48437	0.949099	1.59266	1.59019	1.05924	1.20601	1.31151	1.31809	0.725572	0.972769	1.02065	0.648618	0.713943	0.467932
NC 1510	Tons	2	1.00921	1.339	1.30532	1.06627	0.887996	0.519114	0.565549	1.09857	1.53305	1.18855	1.00827	0.861495	0.963	0.81897	1.34613	1.04197	1.15578	1.18581	1.29234	1.2606	1.00921	1.48901	1.00921	1.58824	1.58587	0.941358	1.09655	1.23086	1.24462	0.628242	0.923455	0.979536	0.670451	0.72383	0.509375
NC 1511	Tons	2	1.01788	1.37607	1.34316	1.07044	0.875368	0.50622	0.578236	1.16396	1.53631	1.2188	1.00366	0.85318	0.973548	0.824387	1.31285	0.989366	1.18093	1.23063	1.33165	1.30358	1.01788	1.48271	1.01788	1.58827	1.58635	1.02225	1.16224	1.27839	1.28373	0.66071	0.934693	0.980854	0.663905	0.698104	0.519346
NC 1512	Tons	2	0.976645	1.39936	1.39315	1.095	0.913172	0.504094	0.478113	1.21304	1.52666	1.27371	1.00942	0.816183	0.933672	0.812705	1.24403	1.01543	1.2202	1.25484	1.36157	1.34526	0.976645	1.49061	0.976645	1.59305	1.59021	1.10585	1.21858	1.33858	1.34928	0.668746	0.969857	1.02651	0.728075	0.780688	0.477585
NC 1513	Tons	2	1.02519	1.3801	1.35327	1.08361	0.905626	0.523056	0.591897	1.16126	1.52477	1.22872	1.01387	0.85146	0.95638	0.828306	1.28723	1.01779	1.18806	1.22574	1.32864	1.30561	1.02519	1.48469	1.02519	1.58642	1.58297	1.02848	1.16256	1.28483	1.29376	0.656362	0.944051	0.994075	0.684178	0.7286	0.468811
NC 1514	Tons	2	0.902032	1.36697	1.38106	1.11284	0.900588	0.483231	0.397059	1.19609	1.53961	1.26982	1.0186	0.780808	0.850441	0.742227	1.28381	1.00548	1.18752	1.22574	1.32885	1.3181	0.902032	1.49028	0.902032	1.5946	1.59464	1.07358	1.20772	1.32771	1.34155	0.721668	0.99877	1.05514	0.710588	0.787119	0.406664
NC 1515	Tons	2	0.957126	1.38865	1.38586	1.12743	0.92753	0.52571	0.473759	1.20109	1.53311	1.25918	1.00768	0.836638	0.91313	0.786407	1.28078	1.00409	1.187	1.24942	1.35095	1.33307	0.957126	1.4692	0.957126	1.5912	1.59085	1.05559	1.20264	1.32919	1.33957	0.697645	1.00912	1.05704	0.731226	0.809009	0.488166
NC 1117	Ranguba_Ken river	3	1.0085	1.38966	1.38424	1.15282	0.957274	0.535807	0.509693	1.18019	1.51448	1.24548	1.04196	0.850683	0.958739	0.845848	1.24468	0.966247	1.16832	1.22519	1.34652	1.32942	1.0085	1.47107	1.0085	1.59155	1.58679	1.02519	1.18221	1.32427	1.33312	0.731685	1.03671	1.07993	0.77269	0.823156	0.478564
NC 1118	Ranguba_Ken river	3	0.906903	1.38696	1.41702	1.18348	0.97844	0.545423	0.250226	1.21419	1.52619	1.28914	1.05723	0.827738	0.880336	0.797019	1.24064	0.991591	1.2022	1.24711	1.36035	1.3537	0.906903	1.51069	0.906903	1.60623	1.6012	1.0935	1.23168	1.37142	1.38981	0.761519	1.08214	1.14845	0.813978	0.919983	0.516885
NC 1119	Ranguba_Ken river	3	0.891833	1.3798	1.39477	1.16798	0.94975	0.524732	0.34514	1.21039	1.53241	1.26104	1.01742	0.801664	0.84356	0.746256	1.25257	0.944613	1.16843	1.2467	1.3479	1.33752	0.891833	1.47741	0.891833	1.59871	1.59675	1.04919	1.21465	1.34556	1.35815	0.762705	1.06619	1.11735	0.767281	0.868894	0.469629
NC 1120	Ranguba_Ken river	3	0.962772	1.37153	1.37448	1.13537	0.935141	0.520111	0.459317	1.17511	1.52216	1.24523	1.02556	0.842346	0.922714	0.80078	1.26283	0.967018	1.15919	1.21834	1.33209	1.31614	0.962772	1.48723	0.962772	1.59579	1.59024	1.02807	1.18049	1.3172	1.32949	0.710052	1.02043	1.07226	0.74857	0.824937	0.493129
NC 1121	Ranguba_Ken river	3	0.954169	1.35243	1.3347	1.10592	0.879331	0.530916	0.508805	1.15273	1.53202	1.20797	1.01471	0.83222	0.916072	0.77007	1.30215	0.975643	1.15292	1.21424	1.3107	1.28629	0.954169	1.48629	0.954169	1.59238	1.58705	0.97295	1.14898	1.26928	1.27745	0.723858	0.977735	1.02498	0.65451	0.723962	0.488483
NC 1122	Ranguba_Ken river	3	0.96313	1.361	1.34901	1.08266	0.893279	0.331071	0.298187	1.16056	1.53213	1.21855	0.982109	0.808413	0.941583	0.855454	1.29983	0.966358	1.16291	1.21284	1.33771	1.3223	0.96313	1.48818	0.96313	1.60352	1.60103	1.02574	1.16278	1.31168	1.31717	0.653089	1.00478	1.03516	0.778307	0.807803	0.361091
NC 1123	Ranguba_Ken river	3	0.915249	1.37879	1.38821	1.15112	0.914265	0.520819	0.428676	1.20472	1.53052	1.26424	1.02291	0.772491	0.858864	0.746731	1.25215	0.969498	1.163	1.23536	1.33884	1.32741	0.915249	1.48133	0.915249	1.59507	1.59189	1.03964	1.21221	1.33235	1.34489	0.781186	1.04006	1.08835	0.713962	0.793149	0.439845
NC 1124	Ranguba_Ken river	3	0.933866	1.36533	1.37589	1.1745	0.947519	0.568253	0.420621	1.17019	1.52433	1.22822	1.01535	0.777651	0.871588	0.778573	1.27039	0.930336	1.12581	1.21034	1.32296	1.31283	0.933866	1.47072	0.933866	1.59418	1.59173	0.98304	1.17967	1.31444	1.32835	0.787065	1.05983	1.1062	0.741975	0.825603	0.456118
NC 1125	Ranguba_Ken river	3	0.969125	1.3581	1.34753	1.13784	0.901655	0.481767	0.456121	1.15355	1.53165	1.21911	1.03611	0.848054	0.933687	0.812538	1.30141	0.972226	1.13877	1.21276	1.32066	1.30107	0.969125	1.46721	0.969125	1.59416	1.59204	0.955695	1.15628	1.29092	1.30027	0.765652	1.03445	1.07403	0.716856	0.782471	0.462623
NC 1126	Ranguba_Ken river	3	0.937726	1.36415	1.3692	1.16641	0.919809	0.549061	0.459019	1.17367	1.52931	1.23849	1.04553	0.79965	0.891536	0.765272	1.27808	0.956699	1.13748	1.21291	1.32182	1.30683	0.937726	1.4679	0.937726	1.59259	1.59006	0.977368	1.18071	1.30735	1.32069	0.80907	1.05251	1.10116	0.711319	0.792136	0.485808
NC 1127	Ranguba_Ken river	3	0.914208	1.34519	1.35386	1.15209	0.911899	0.529631	0.393696	1.15652	1.53247	1.22551	1.03105	0.804083	0.877032	0.761438	1.29455	0.946398	1.11852	1.19741	1.3062	1.29403	0.914208	1.47981	0.914208	1.59654	1.59403	0.959267	1.16356	1.29459	1.31063	0.783284	1.04213	1.09295	0.710836	0.803182	0.468557
NC 1128	Ranguba_Ken river	3	0.926821	1.35334	1.36096	1.17175	0.95784	0.592483	0.337839	1.15385	1.52692	1.20714	1.00163	0.811999	0.904373	0.801481	1.28859	0.931881	1.10857	1.20889	1.32458	1.30958	0.926821	1.46263	0.926821	1.59866	1.59704	0.941629	1.15826	1.30593	1.32124	0.771683	1.06687	1.11478	0.767662	0.866576	0.537868
NC 1129	Ranguba_Ken river	3	0.955109	1.365	1.3724	1.1923	0.95077	0.543717	0.460827	1.16356	1.52316	1.23271	1.05001	0.823723	0.895569	0.789352	1.27371	0.948941	1.10419	1.20497	1.31984	1.30755	0.955109	1.45362	0.955109	1.59213	1.58975	0.928924	1.16922	1.30995	1.32397	0.824485	1.08707	1.12726	0.752635	0.834314	0.464262
NC 1130	Ranguba_Ken river	3	0.964742	1.37122	1.36184	1.10304	0.901712	0.491281	0.489835	1.17521	1.53077	1.23106	0.985472	0.806259	0.906246	0.791488	1.28558	0.963036	1.15877	1.22253	1.32824	1.31108	0.964742	1.47931	0.964742	1.59176	1.58917	1.02805	1.17779	1.30335	1.31066	0.685331	0.984167	1.02265	0.704362	0.755395	0.41772
NC 1192	Ranguba_Ken river	3	0.927428	1.35889	1.35706	1.10925	0.88598	0.455402	0.400448	1.17411	1.5342	1.2326	0.991412	0.788232	0.890244	0.774176	1.2877	0.957786	1.14566	1.21627	1.32475	1.31004	0.927428	1.48438	0.927428	1.59782	1.59543	1.01478	1.17913	1.30639	1.31814	0.720267	1.0069	1.05359	0.712236	0.782842	0.457107
NC 1193	Ranguba_Ken river	3	1.07633	1.38541	1.36232	1.10966	0.953514	0.553142	0.626792	1.15237	1.52473	1.23116	1.02485	0.883851	1.01058	0.889531	1.29447	0.965355	1.14875	1.20258	1.32897	1.30684	1.07633	1.46501	1.07633	1.58314	1.58202	1.01135	1.15222	1.29098	1.29862	0.641785	0.969745	1.00673	0.747602	0.765737	0.496289
NC 1194	Ranguba_Ken river	3	1.00232	1.38348	1.37165	1.08082	0.935038	0.539932	0.53821	1.17563	1.52817	1.2396	0.986068	0.830725	0.942274	0.824758	1.28733	0.986399	1.18897	1.22211	1.33595	1.31792	1.00232	1.484	1.00232	1.58705	1.5863	1.06959	1.17513	1.30678	1.31623	0.584904	0.936454	0.987927	0.731443	0.7764	0.457757
NC 1195	Ranguba_Ken river	3	0.974462	1.39225	1.38241	1.13539	0.919444	0.539852	0.50691	1.2002	1.52816	1.24866	1.00533	0.802182	0.921283	0.798136	1.26402	0.970992	1.17184	1.24365	1.34973	1.33253	0.974462	1.46528	0.974462	1.58954	1.58777	1.03587	1.19991	1.32199	1.33049	0.7403	1.01409	1.05495	0.715468	0.76717	0.471825
NC 1196	Ranguba_Ken river	3	1.02559	1.39355	1.37329	1.11463	0.939392	0.55568	0.579009	1.17885	1.52764	1.22988	0.995212	0.863993	0.963661	0.837351	1.29142	0.962286	1.17304	1.23695	1.34446	1.32349	1.02559	1.46493	1.02559	1.58479	1.5845	1.03554	1.17534	1.30644	1.31295	0.646981	0.97819	1.01829	0.724193	0.778917	0.49581
NC 1247	Lagarghat_Ranguwa_Ken river	3	1.02586	1.40048	1.37012	1.12101	0.919663	0.481335	0.493795	1.18951	1.52696	1.23488	1.01087	0.875089	0.991475	0.880323	1.28111	1.00534	1.18672	1.25639	1.36585	1.34348	1.02586	1.46315	1.02586	1.59255	1.58959	1.01977	1.18032	1.31638	1.3185	0.697347	1.01507	1.03773	0.749148	0.773202	0.44954
NC 1248	Lagarghat_Ranguwa_Ken river	3	1.00615	1.38585	1.37488	1.08025	0.924472	0.525347	0.522915	1.17774	1.51797	1.24438	0.977108	0.824888	0.957934	0.83573	1.25403	0.988226	1.18534	1.22519	1.34211	1.32313	1.00615	1.49149	1.00615	1.59113	1.58615	1.07677	1.18398	1.31334	1.32298	0.594027	0.943229	0.992423	0.733667	0.771991	0.485743
NC 1249	Lagarghat_Ranguwa_Ken river	3	0.97239	1.3589	1.34516	1.01857	0.849092	0.460743	0.528091	1.17053	1.55327	1.24158	0.967512	0.823128	0.922572	0.780748	1.34304	0.981359	1.1742	1.21622	1.31419	1.29435	0.97239	1.49815	0.97239	1.59046	1.59307	1.07208	1.1791	1.28632	1.29735	0.571567	0.879218	0.937922	0.639437	0.694874	0.471079
NC 1250	Lagarghat_Ranguwa_Ken river	3	0.998715	1.35808	1.34422	1.08339	0.915712	0.486648	0.509132	1.14169	1.5291	1.21278	0.98268	0.856351	0.950418	0.830375	1.30615	0.959591	1.14062	1.19803	1.31434	1.29427	0.998715	1.48208	0.998715	1.59149	1.58953	1.00778	1.14231	1.28353	1.2927	0.600851	0.960467	1.00286	0.729184	0.784288	0.467871
NC 1251	Lagarghat_Ranguwa_Ken river	3	1.02886	1.38218	1.373	1.11935	0.974173	0.538607	0.50666	1.15105	1.50823	1.21927	0.997784	0.844701	0.979434	0.876522	1.25824	0.960724	1.16662	1.20388	1.33909	1.32083	1.02886	1.47933	1.02886	1.59139	1.5868	1.03574	1.15274	1.31145	1.31956	0.607393	0.993104	1.03615	0.801575	0.838417	0.47386
NC 1252	Lagarghat_Ranguwa_Ken river	3	0.954092	1.36122	1.37646	1.15608	0.965487	0.514383	0.32569	1.15585	1.51948	1.2359	1.02621	0.807238	0.933884	0.836999	1.27342	0.964427	1.14637	1.19146	1.33285	1.32033	0.954092	1.48698	0.954092	1.6025	1.59838	1.01338	1.16594	1.32799	1.34434	0.721082	1.05815	1.11434	0.823081	0.891488	0.522701
NC 1253	Lagarghat_Ranguwa_Ken river	3	1.00275	1.37576	1.36645	1.12678	0.928852	0.553083	0.542331	1.16588	1.52044	1.23383	1.0297	0.853302	0.954496	0.823572	1.26858	0.965602	1.15934	1.21716	1.32897	1.30844	1.00275	1.47701	1.00275	1.58942	1.58457	1.0139	1.17039	1.30055	1.30974	0.709848	0.996364	1.04394	0.718716	0.774255	0.500352
NC 1254	Lagarghat_Ranguwa_Ken river	3	0.91434	1.36432	1.37482	1.16202	0.951026	0.500225	0.353439	1.17658	1.52769	1.23564	1.02472	0.811054	0.86582	0.775233	1.27315	0.989576	1.17245	1.22709	1.33286	1.31971	0.91434	1.48711	0.91434	1.59969	1.59622	1.01373	1.17964	1.32387	1.33649	0.747716	1.06213	1.11087	0.780085	0.865418	0.439495
NC 1255	Lagarghat_Ranguwa_Ken river	3	0.988875	1.37279	1.35789	1.1105	0.906933	0.525106	0.520031	1.17135	1.52806	1.22454	0.99178	0.865667	0.945891	0.812664	1.28059	0.934491	1.14007	1.22674	1.32921	1.30902	0.988875	1.47315	0.988875	1.59078	1.5874	1.00684	1.17027	1.29608	1.30342	0.683385	0.987529	1.02523	0.696097	0.768409	0.495922
NC 1256	Lagarghat_Ranguwa_Ken river	3	0.994231	1.36132	1.33634	1.07162	0.881559	0.464655	0.524719	1.14991	1.52541	1.20684	0.99419	0.823464	0.939504	0.816187	1.29085	0.970498	1.16483	1.21084	1.31811	1.29585	0.994231	1.49415	0.994231	1.59322	1.58753	1.00858	1.15012	1.27679	1.28289	0.661511	0.949991	0.992596	0.688349	0.722996	0.447922
NC 1257	Lagarghat_Ranguwa_Ken river	3	0.968793	1.38394	1.37678	1.1425	0.917501	0.525593	0.477061	1.19192	1.52378	1.24953	1.0383	0.850767	0.925493	0.807	1.25259	0.983964	1.17659	1.24403	1.34375	1.32665	0.968793	1.47922	0.968793	1.59346	1.58839	1.02432	1.19409	1.31791	1.32619	0.754324	1.02669	1.06826	0.712958	0.780907	0.445666
NC 1258	Lagarghat_Ranguwa_Ken river	3	1.01887	1.39792	1.38782	1.15137	0.944366	0.553435	0.533553	1.18981	1.51308	1.25369	1.05097	0.864037	0.969651	0.852071	1.2333	0.985253	1.18238	1.2418	1.35327	1.33516	1.01887	1.47213	1.01887	1.59005	1.58465	1.03318	1.19486	1.32513	1.33397	0.74916	1.02875	1.07288	0.742589	0.794333	0.485906
NC 1131	Uzan Bazar_Guwahati_Brahamaputra	4	0.962856	1.39389	1.37299	1.13811	0.869142	0.447943	0.423559	1.21281	1.54514	1.25251	1.03673	0.843068	0.937966	0.818644	1.31264	0.998552	1.18629	1.27198	1.36469	1.34529	0.962856	1.45457	0.962856	1.59486	1.59555	1.01509	1.2112	1.326	1.33039	0.804935	1.04617	1.07576	0.692524	0.744565	0.440107
NC 1132	Uzan Bazar_Guwahati_Brahamaputra	4	0.881096	1.37387	1.37807	1.14649	0.860228	0.471512	0.365527	1.21544	1.54528	1.27073	1.04784	0.784897	0.854102	0.727152	1.28289	1.00274	1.17939	1.25541	1.34371	1.3291	0.881096	1.47294	0.881096	1.59759	1.59648	1.02843	1.22323	1.32974	1.34035	0.832248	1.04994	1.09403	0.6651	0.749834	0.431432
NC 1133	Uzan Bazar_Guwahati_Brahamaputra	4	0.912303	1.36813	1.36455	1.0967	0.866889	0.449003	0.336035	1.19548	1.54336	1.25343	1.00528	0.80207	0.90055	0.780757	1.29962	1.00842	1.18653	1.2421	1.34287	1.32614	0.912303	1.48568	0.912303	1.59944	1.59877	1.04941	1.19972	1.31939	1.32964	0.718779	0.997321	1.04403	0.703086	0.766058	0.446226
NC 1135	Uzan Bazar_Guwahati_Brahamaputra	4	1.01029	1.39122	1.36885	1.18882	0.920491	0.533222	0.51361	1.18109	1.5233	1.23962	1.1106	0.872883	0.974886	0.84899	1.27211	1.02746	1.19747	1.24913	1.35312	1.33008	1.01029	1.45417	1.01029	1.59103	1.5873	0.955432	1.17838	1.30779	1.31591	0.868872	1.08337	1.1255	0.723043	0.775059	0.497789
NC 1136	Uzan Bazar_Guwahati_Brahamaputra	4	1.01872	1.38992	1.36437	1.09686	0.898176	0.467591	0.499637	1.1857	1.53959	1.24833	1.03874	0.877865	0.981969	0.86626	1.31263	1.02042	1.20068	1.24694	1.35258	1.33157	1.01872	1.47371	1.01872	1.5916	1.59159	1.04021	1.18311	1.30933	1.31583	0.69155	0.983163	1.02292	0.718665	0.752391	0.452362
NC 1137	Uzan Bazar_Guwahati_Brahamaputra	4	1.02909	1.38735	1.36294	1.14068	0.920403	0.542841	0.554461	1.16973	1.52404	1.23311	1.05791	0.880708	0.988242	0.856791	1.28153	1.00608	1.17819	1.23671	1.34398	1.31968	1.02909	1.46298	1.02909	1.5882	1.58508	0.987173	1.16874	1.29758	1.3054	0.759034	1.01806	1.06085	0.714399	0.760583	0.513187
NC 1138	Uzan Bazar_Guwahati_Brahamaputra	4	0.991881	1.37107	1.35624	1.10142	0.923096	0.508735	0.455268	1.15846	1.52919	1.22647	1.01946	0.864088	0.9648	0.845957	1.30259	1.01166	1.18638	1.2239	1.33684	1.31547	0.991881	1.4816	0.991881	1.59344	1.59203	1.02476	1.15777	1.29902	1.30918	0.648744	0.981404	1.03216	0.745761	0.801904	0.489214
NC 1139	Uzan Bazar_Guwahati_Brahamaputra	4	0.976132	1.38451	1.37035	1.08318	0.886044	0.484638	0.475744	1.19654	1.53514	1.25837	1.01486	0.84043	0.939138	0.816288	1.27995	1.01611	1.20265	1.24642	1.34677	1.32835	0.976132	1.48804	0.976132	1.59284	1.59083	1.06862	1.19793	1.31469	1.32382	0.672767	0.960537	1.00926	0.693473	0.742963	0.449772
NC 1140	Uzan Bazar_Guwahati_Brahamaputra	4	1.09427	1.40722	1.36533	1.11555	0.932758	0.512332	0.623122	1.16859	1.52599	1.22784	1.03802	0.911889	1.04712	0.916601	1.29988	1.00591	1.18955	1.24768	1.36315	1.33351	1.09427	1.46059	1.09427	1.58693	1.58469	1.01232	1.16699	1.30259	1.30431	0.685539	0.993641	1.02214	0.747544	0.754391	0.546637
NC 1141	Dhuburi_Brahamaputra	4	0.94059	1.38686	1.38212	1.12507	0.888559	0.463355	0.437276	1.21058	1.53281	1.27087	1.04811	0.824107	0.90175	0.778438	1.25657	1.03064	1.21234	1.25765	1.35317	1.33623	0.94059	1.48946	0.94059	1.59667	1.59274	1.06135	1.21472	1.33161	1.34193	0.765521	1.02066	1.07128	0.704286	0.775468	0.450158
NC 1142	Dhuburi_Brahamaputra	4	0.910246	1.37748	1.38479	1.11123	0.881862	0.436603	0.355584	1.21264	1.53965	1.28291	1.03589	0.809028	0.879041	0.769589	1.26673	1.02359	1.20167	1.24702	1.3464	1.33486	0.910246	1.49368	0.910246	1.59884	1.59743	1.07936	1.2217	1.33852	1.35154	0.741461	1.01121	1.06407	0.711269	0.785403	0.413394
NC 1143	Dhuburi_Brahamaputra	4	0.974542	1.36638	1.34989	1.08313	0.882131	0.46741	0.472713	1.16788	1.53581	1.22984	0.99977	0.832068	0.938803	0.814669	1.3039	0.99145	1.17046	1.22333	1.32948	1.30815	0.974542	1.48477	0.974542	1.594	1.59128	1.02459	1.16938	1.29445	1.30118	0.671831	0.967508	1.00711	0.698948	0.738538	0.447389
NC 1145	Dhuburi_Brahamaputra	4	1.02109	1.3783	1.36528	1.09587	0.934963	0.499032	0.449452	1.15774	1.52779	1.23419	1.02162	0.870852	0.999126	0.888473	1.30137	0.999664	1.18664	1.21892	1.34525	1.32465	1.02109	1.47878	1.02109	1.59354	1.59306	1.04628	1.1643	1.31125	1.32006	0.624838	0.979103	1.02568	0.777694	0.812025	0.490451
NC 1147	Dhuburi_Brahamaputra	4	0.9667	1.36462	1.35429	1.09311	0.897734	0.50736	0.47351	1.16733	1.53133	1.23347	1.01645	0.83039	0.927276	0.804553	1.28991	0.989933	1.17713	1.21722	1.324	1.30557	0.9667	1.49051	0.9667	1.5927	1.58988	1.03108	1.16797	1.29388	1.30428	0.679865	0.966288	1.01859	0.699434	0.754823	0.451394
NC 1149	Uzan Bazar_Guwahati_Brahamaputra	4	0.944456	1.38685	1.37439	1.12627	0.8645	0.460393	0.421744	1.21417	1.54131	1.26992	1.05637	0.829249	0.9222	0.793282	1.27988	1.02947	1.20296	1.26172	1.35607	1.33787	0.944456	1.47578	0.944456	1.59629	1.59449	1.03787	1.2139	1.32486	1.33429	0.796275	1.02558	1.07037	0.682398	0.74057	0.456682
NC 1150	Uzan Bazar_Guwahati_Brahamaputra	4	0.982385	1.38185	1.36531	1.11001	0.911679	0.501761	0.443398	1.18077	1.53092	1.23613	1.01473	0.850558	0.956126	0.83824	1.29131	1.00657	1.18994	1.24171	1.34933	1.32901	0.982385	1.47683	0.982385	1.59426	1.59246	1.03194	1.17846	1.31108	1.31916	0.686795	0.996569	1.03961	0.734564	0.785819	0.474478
NC 1153	Ganga_Farakka_Baraj market	5	0.995652	1.39824	1.3786	1.09129	0.871132	0.50205	0.552362	1.20429	1.52931	1.25632	0.996118	0.778335	0.92824	0.804253	1.26402	1.01014	1.20442	1.25614	1.35165	1.33259	0.995652	1.48038	0.995652	1.58793	1.58529	1.07512	1.21762	1.31741	1.32373	0.733255	0.961212	1.0026	0.653242	0.671263	0.432025
NC 1154	Ganga_Farakka_Baraj market	5	0.978201	1.37911	1.35268	1.06684	0.877174	0.429887	0.471086	1.18393	1.53463	1.22884	0.986983	0.812438	0.935653	0.818959	1.29103	0.994526	1.1977	1.23763	1.34366	1.32321	0.978201	1.49028	0.978201	1.59481	1.59199	1.05219	1.1752	1.30101	1.30538	0.648324	0.954737	0.993232	0.706886	0.733544	0.419679
NC 1155	Ganga_Farakka_Baraj market	5	1.00155	1.38761	1.37133	1.09187	0.91046	0.526547	0.57052	1.18226	1.52877	1.25119	1.01494	0.845072	0.943379	0.803776	1.28229	1.03765	1.20653	1.23987	1.34087	1.31624	1.00155	1.48289	1.00155	1.58695	1.58354	1.06286	1.18554	1.30587	1.31324	0.656965	0.953455	1.00318	0.695445	0.742672	0.474356
NC 1159	Ganga_Farakka_Baraj market	5	0.921184	1.37463	1.36967	1.09161	0.860436	0.429584	0.377836	1.20678	1.54341	1.27216	1.02335	0.831087	0.89591	0.784565	1.28501	1.03882	1.2021	1.25326	1.34428	1.3288	0.921184	1.49072	0.921184	1.5977	1.59566	1.06539	1.21043	1.32219	1.33026	0.716706	0.988471	1.02758	0.681285	0.73633	0.365319
Nc 1220	Ganga_Farakka_Baraj market	5	0.981142	1.37685	1.36219	1.09707	0.9148	0.499035	0.477709	1.17513	1.53256	1.23282	1.00227	0.838766	0.944552	0.820464	1.29706	0.991097	1.18381	1.22878	1.33984	1.31926	0.981142	1.47943	0.981142	1.59224	1.59108	1.04012	1.17103	1.30543	1.31362	0.651024	0.976778	1.02346	0.733284	0.784179	0.478072
Nc 1221	Ganga_Farakka_Baraj market	5	0.978927	1.37478	1.36468	1.14304	0.913136	0.54889	0.54898	1.17623	1.52927	1.23608	1.04057	0.836513	0.922619	0.780656	1.27987	0.962799	1.15266	1.2228	1.32558	1.30569	0.978927	1.46521	0.978927	1.58722	1.58472	0.991269	1.17542	1.29716	1.30679	0.767806	1.01719	1.06386	0.687412	0.759269	0.491042
Nc 1222	Ganga_Farakka_Baraj market	5	0.956857	1.38273	1.37453	1.12162	0.901566	0.483908	0.41147	1.19638	1.53698	1.25602	1.0321	0.837822	0.933191	0.815057	1.29121	1.01558	1.19513	1.24775	1.35196	1.33403	0.956857	1.47372	0.956857	1.59519	1.5947	1.04349	1.19757	1.32379	1.3332	0.732313	1.01554	1.06075	0.727373	0.785761	0.459679
Nc 1223	Ganga_Farakka_Baraj market	5	1.01201	1.37195	1.34719	1.08676	0.872301	0.514754	0.587136	1.16761	1.53437	1.23394	1.02171	0.861543	0.96479	0.809067	1.29755	0.987739	1.16365	1.22601	1.32404	1.299	1.01201	1.48008	1.01201	1.58806	1.58556	1.01008	1.1703	1.28075	1.29137	0.70203	0.95299	1.00571	0.646761	0.70794	0.534834
Nc 1226	Ganga_Farakka_Baraj market	5	0.952848	1.36475	1.35839	1.10812	0.918567	0.527664	0.464709	1.16689	1.52511	1.22394	0.995589	0.829577	0.910755	0.785748	1.2753	0.968436	1.16673	1.21987	1.32532	1.30678	0.952848	1.49284	0.952848	1.59479	1.58954	1.02552	1.16567	1.29819	1.30839	0.663405	0.982567	1.03421	0.718101	0.793756	0.475887
Nc 1227	Ganga_Farakka_Baraj market	5	0.945299	1.36479	1.35817	1.09584	0.892125	0.50529	0.474471	1.17995	1.532	1.24053	1.00871	0.82516	0.904536	0.769495	1.27724	0.968674	1.16786	1.22125	1.32354	1.30634	0.945299	1.49392	0.945299	1.59398	1.58976	1.03584	1.17739	1.29878	1.31018	0.683511	0.970902	1.02563	0.687433	0.76213	0.471538
NC 1160	Ganga_Farakka_Baraj market	5	1.00859	1.39271	1.3697	1.1103	0.902988	0.459082	0.537096	1.18802	1.53296	1.243	1.02201	0.805173	0.939423	0.830649	1.29391	1.01038	1.19561	1.23854	1.34811	1.32982	1.00859	1.46882	1.00859	1.58958	1.58932	1.03825	1.18788	1.31273	1.31901	0.734987	0.99963	1.03742	0.718589	0.74215	0.410625
NC 1164	Manikchak_Malda_Ganga	5	0.95765	1.37993	1.36561	1.06834	0.887035	0.424775	0.383084	1.19184	1.53774	1.2514	0.991844	0.803845	0.924794	0.833829	1.29521	1.04035	1.21654	1.24042	1.34962	1.33399	0.95765	1.49233	0.95765	1.5963	1.59539	1.08213	1.18901	1.31785	1.32359	0.637014	0.959408	0.994917	0.731013	0.749238	0.333027
NC 1165	Manikchak_Malda_Ganga	5	0.933168	1.38474	1.3793	1.0972	0.872713	0.499972	0.484765	1.21059	1.54016	1.26624	0.995676	0.791354	0.892071	0.748296	1.28419	1.01729	1.201	1.25586	1.34786	1.32589	0.933168	1.48063	0.933168	1.59166	1.58888	1.07906	1.21856	1.32382	1.328	0.714716	0.974885	1.01319	0.664515	0.711044	0.434751
nc 1197	Gomti river	6	1.03167	1.3879	1.35434	1.09081	0.908329	0.479876	0.537854	1.16817	1.53224	1.21784	1.02826	0.898286	1.00032	0.865172	1.31014	0.993174	1.20441	1.24671	1.35261	1.32415	1.03167	1.47678	1.03167	1.5917	1.58978	1.03431	1.16244	1.29881	1.30087	0.64544	0.973357	1.01719	0.730351	0.776781	0.524724
nc 1198	Gomti river	6	1.00819	1.38226	1.35761	1.13067	0.902898	0.480757	0.515535	1.17341	1.53474	1.22665	1.03226	0.879671	0.972669	0.84088	1.30715	0.984002	1.16345	1.24146	1.34517	1.32133	1.00819	1.45827	1.00819	1.59157	1.59109	0.983803	1.17076	1.30171	1.30763	0.746081	1.0255	1.06147	0.717969	0.778878	0.506604
nc 1199	Gomti river	6	1.03803	1.40775	1.39715	1.11774	0.972637	0.580332	0.560988	1.19004	1.51815	1.26163	1.0406	0.890752	0.989684	0.86474	1.25946	1.02396	1.22752	1.24768	1.36233	1.34196	1.03803	1.475	1.03803	1.58479	1.58444	1.09652	1.19179	1.33101	1.34253	0.613484	0.971375	1.03705	0.770604	0.833369	0.533255
nc 1203	Gomti river	6	0.937936	1.37837	1.37548	1.12494	0.902761	0.49267	0.421798	1.19859	1.53753	1.25491	1.02207	0.833801	0.907848	0.781843	1.28429	0.981328	1.18	1.24499	1.34493	1.32864	0.937936	1.47322	0.937936	1.59457	1.59448	1.04475	1.20092	1.32377	1.33447	0.731566	1.0168	1.06639	0.716274	0.798466	0.479507
nc 1204	Gomti river	6	0.966383	1.3708	1.36043	1.10657	0.893556	0.483224	0.475441	1.17717	1.53599	1.23775	1.01953	0.833518	0.925107	0.79895	1.29721	0.977247	1.17359	1.22776	1.33176	1.31341	0.966383	1.47789	0.966383	1.59248	1.59178	1.02961	1.17974	1.30413	1.31371	0.710294	0.991514	1.04068	0.702053	0.767073	0.467281
nc 1205	Gomti river	6	0.945939	1.37293	1.36347	1.12468	0.903521	0.493422	0.471831	1.18837	1.53646	1.2423	1.0241	0.822527	0.897373	0.771056	1.28733	0.979613	1.16797	1.22996	1.33233	1.31566	0.945939	1.47303	0.945939	1.59195	1.5909	1.01449	1.17969	1.3056	1.3156	0.73474	1.01151	1.05691	0.707211	0.776513	0.446825
nc 1206	Gomti river	6	1.0179	1.39254	1.36838	1.12376	0.912774	0.513048	0.550536	1.18371	1.5297	1.234	1.03055	0.876898	0.974328	0.838785	1.28687	0.979283	1.1835	1.24829	1.35096	1.32696	1.0179	1.46372	1.0179	1.58878	1.58721	1.02169	1.18151	1.30823	1.31305	0.718998	1.00482	1.0455	0.712925	0.770568	0.509975
nc 1207	Gomti river	6	0.941577	1.37639	1.36835	1.12438	0.894417	0.47382	0.446385	1.19314	1.53797	1.24588	1.02478	0.828691	0.89978	0.775836	1.29286	0.989527	1.18298	1.24468	1.34087	1.32322	0.941577	1.4726	0.941577	1.59378	1.59322	1.03114	1.19361	1.31553	1.32438	0.743968	1.01789	1.06357	0.705164	0.781943	0.452883
nc 1210	Gomti river	6	0.979635	1.38158	1.37644	1.15624	0.955183	0.568163	0.486558	1.17753	1.52442	1.24782	1.067	0.882527	0.950855	0.816555	1.2734	1.03042	1.20105	1.23813	1.3448	1.32238	0.979635	1.47306	0.979635	1.59154	1.58829	1.01785	1.17294	1.31398	1.32575	0.734364	1.03307	1.08856	0.756513	0.834584	0.520782
nc 1211	Gomti river	6	0.933059	1.37673	1.3716	1.14223	0.903011	0.48188	0.459647	1.19535	1.53352	1.24673	1.03976	0.823794	0.874428	0.755976	1.27423	0.986659	1.18477	1.2453	1.3373	1.32184	0.933059	1.47665	0.933059	1.59346	1.59138	1.0245	1.19532	1.31634	1.32649	0.774195	1.03613	1.08388	0.705066	0.793262	0.437097
nc 1212	Gomti river	6	0.930851	1.36903	1.36719	1.12281	0.8998	0.505999	0.441422	1.18833	1.53374	1.2441	1.01629	0.83909	0.887272	0.762985	1.27549	0.95726	1.16357	1.23659	1.3296	1.3154	0.930851	1.48264	0.930851	1.59409	1.59202	1.02987	1.1918	1.31037	1.32234	0.728151	1.00723	1.05917	0.691474	0.791601	0.462134
nc 1213	Gomti river	6	0.955452	1.38323	1.36694	1.09816	0.869814	0.462207	0.490309	1.20259	1.53912	1.24801	1.00842	0.821969	0.905221	0.774841	1.28582	0.977416	1.18947	1.25228	1.34408	1.32583	0.955452	1.47935	0.955452	1.59256	1.5912	1.05116	1.20133	1.3128	1.31972	0.721168	0.985312	1.02965	0.668927	0.73687	0.445851
nc 1214	Gomti river	6	0.900491	1.36277	1.36286	1.13031	0.884234	0.454872	0.377969	1.19067	1.53852	1.24608	1.03112	0.805088	0.856023	0.747908	1.2833	0.984931	1.17402	1.23537	1.32842	1.31584	0.900491	1.4865	0.900491	1.59749	1.59563	1.01973	1.19219	1.31205	1.32352	0.770653	1.03002	1.07655	0.697183	0.781584	0.400067
nc 1215	Gomti river	6	0.997757	1.38785	1.37192	1.08553	0.901769	0.52975	0.557461	1.1916	1.53316	1.25155	1.01456	0.848566	0.95088	0.803823	1.28165	0.989147	1.19903	1.24074	1.34261	1.32119	0.997757	1.48317	0.997757	1.5877	1.58668	1.07183	1.19203	1.3086	1.3186	0.655329	0.946002	1.00685	0.687573	0.751059	0.521607
NC 1241	Gomti river	6	0.940188	1.37678	1.39941	1.15511	0.983663	0.523585	0.356149	1.18625	1.52236	1.26122	1.00686	0.813618	0.897146	0.811796	1.25456	0.944038	1.15693	1.20994	1.34303	1.33437	0.940188	1.48735	0.940188	1.59998	1.59627	1.06891	1.19518	1.35037	1.36461	0.673524	1.05013	1.10383	0.827888	0.900329	0.484941
NC 1242	Gomti river	6	0.93443	1.38158	1.38137	1.16642	0.919519	0.542568	0.467908	1.2036	1.52691	1.25548	1.05053	0.818084	0.899492	0.753855	1.24771	0.953066	1.15953	1.23986	1.34378	1.32645	0.93443	1.48031	0.93443	1.59675	1.5894	1.01004	1.20135	1.32456	1.33558	0.806968	1.05655	1.1062	0.71777	0.806443	0.528243
NC 1243	Gomti river	6	0.962154	1.38382	1.38931	1.13211	0.939217	0.526237	0.46502	1.19703	1.52074	1.26555	1.01883	0.853819	0.922245	0.79683	1.24398	0.963349	1.16568	1.23337	1.34376	1.32988	0.962154	1.49109	0.962154	1.59638	1.58969	1.05941	1.20199	1.33306	1.34609	0.690391	1.01494	1.06832	0.749168	0.834315	0.505527
NC 1244	Gomti river	6	0.985242	1.37795	1.37224	1.16465	0.978055	0.565176	0.485486	1.16164	1.51994	1.20895	1.00697	0.828724	0.94184	0.823237	1.28172	0.931205	1.14612	1.21305	1.34023	1.31824	0.985242	1.45259	0.985242	1.5908	1.58834	0.988524	1.15367	1.31328	1.31754	0.710781	1.05122	1.08741	0.800202	0.851691	0.505469
NC 1245	Gomti river	6	1.00063	1.38933	1.38558	1.15458	0.964892	0.525059	0.475368	1.17537	1.51282	1.23213	1.0235	0.824678	0.958661	0.847915	1.24731	0.947521	1.1738	1.22351	1.35275	1.33396	1.00063	1.47156	1.00063	1.59473	1.58951	1.0363	1.17949	1.3315	1.33844	0.719526	1.04566	1.09011	0.800847	0.848662	0.508467
NC 1246	Gomti river	6	1.0174	1.40064	1.39048	1.07889	0.916768	0.506765	0.540252	1.2084	1.53197	1.27403	0.98077	0.853079	0.96403	0.843651	1.26226	0.96894	1.18457	1.24238	1.35353	1.33909	1.0174	1.47759	1.0174	1.5873	1.58816	1.10527	1.21132	1.33097	1.34083	0.590671	0.945205	0.988584	0.720227	0.765043	0.466237
NC 1259	Gandak river_Valmiki nagar	7	0.940793	1.39439	1.40173	1.12308	0.907229	0.528209	0.444215	1.22377	1.52944	1.29286	1.0365	0.821903	0.903758	0.77943	1.23289	1.01204	1.20763	1.25687	1.35591	1.34324	0.940793	1.49397	0.940793	1.59477	1.59095	1.0998	1.23485	1.3463	1.35958	0.733508	1.0001	1.05816	0.703436	0.780514	0.466909
NC 1260	Gandak river_Valmiki nagar	7	0.934584	1.37505	1.37678	1.11398	0.905285	0.482476	0.414864	1.19538	1.52953	1.26097	1.02934	0.819269	0.897366	0.779733	1.2594	1.00106	1.19582	1.23562	1.33988	1.32574	0.934584	1.50073	0.934584	1.59782	1.59336	1.06476	1.19933	1.32439	1.33733	0.714254	1.00185	1.05951	0.723182	0.799539	0.457797
NC 1261	Gandak river_Valmiki nagar	7	0.979752	1.37411	1.35347	1.11025	0.883328	0.490485	0.508099	1.17686	1.52831	1.23968	1.04149	0.867619	0.946114	0.804176	1.27572	1.02584	1.18734	1.24139	1.33667	1.31225	0.979752	1.4875	0.979752	1.59443	1.58807	1.00636	1.17441	1.29494	1.3039	0.731493	0.994465	1.0421	0.681582	0.751154	0.496768
NC 1262	Gandak river_Valmiki nagar	7	0.906446	1.37861	1.38844	1.17244	0.926711	0.514481	0.379599	1.20585	1.53081	1.26492	1.05736	0.789473	0.86104	0.755956	1.25267	0.999505	1.18737	1.24139	1.34472	1.33278	0.906446	1.48795	0.906446	1.59854	1.59462	1.03216	1.20881	1.33596	1.34901	0.814477	1.06977	1.1194	0.740675	0.82224	0.441671
NC 1263	Gandak river_Valmiki nagar	7	0.972855	1.38894	1.38189	1.15289	0.931423	0.529581	0.459916	1.19333	1.51856	1.25507	1.05745	0.872473	0.939581	0.816108	1.24069	1.02693	1.20274	1.25607	1.35411	1.33509	0.972855	1.48996	0.972855	1.59696	1.58977	1.02995	1.19595	1.32523	1.33692	0.759069	1.04043	1.09244	0.736323	0.822718	0.501179
NC 1264	Gandak river_Valmiki nagar	7	0.922304	1.38977	1.38946	1.13673	0.90113	0.490681	0.436234	1.21895	1.53131	1.27193	1.02376	0.812668	0.876203	0.751656	1.24325	1.01285	1.19663	1.26339	1.355	1.33938	0.922304	1.48617	0.922304	1.59672	1.59197	1.05977	1.22221	1.33759	1.34825	0.761506	1.02982	1.07753	0.706008	0.793481	0.460255
NC 1265	Gandak river_Valmiki nagar	7	0.967438	1.38301	1.37488	1.14257	0.91787	0.504809	0.441566	1.18978	1.52324	1.25069	1.04355	0.852902	0.939613	0.816688	1.25331	1.01203	1.18479	1.24524	1.35006	1.33081	0.967438	1.4829	0.967438	1.59747	1.59144	1.0192	1.19051	1.32124	1.33107	0.754973	1.03634	1.08104	0.736678	0.80397	0.48528
NC 1266	Gandak river_Valmiki nagar	7	0.88788	1.38035	1.39184	1.16862	0.918385	0.510658	0.326794	1.21634	1.53405	1.27472	1.05733	0.798781	0.85945	0.749607	1.24963	1.0245	1.20347	1.25698	1.35327	1.34056	0.88788	1.49767	0.88788	1.60272	1.59771	1.04754	1.22126	1.34386	1.35897	0.813251	1.06956	1.12509	0.73673	0.835452	0.480767
NC 1267	Gandak river_Valmiki nagar	7	0.928563	1.37312	1.37222	1.12722	0.89987	0.482108	0.434043	1.19229	1.53112	1.25094	1.02742	0.834275	0.875488	0.764637	1.26652	0.996781	1.18649	1.2456	1.33491	1.32036	0.928563	1.49091	0.928563	1.59556	1.59169	1.04025	1.19859	1.3176	1.32749	0.740514	1.01753	1.06383	0.700342	0.786049	0.405227
NC 1268	Gandak river_Valmiki nagar	7	0.928297	1.37347	1.37489	1.14674	0.90268	0.500278	0.440678	1.19395	1.53121	1.2589	1.05981	0.83402	0.882692	0.761248	1.26472	1.01406	1.19263	1.24331	1.33556	1.31997	0.928297	1.49026	0.928297	1.5956	1.59123	1.0287	1.19968	1.31875	1.33051	0.787431	1.03757	1.0882	0.699294	0.787241	0.438435
